1 **Dynamics and variability in regenerative potential of neuronal subtypes in the**  
2 ***Nematostella* nerve net**

3

4 Jamie A. Havrilak<sup>1</sup>, Layla Al-Shaer<sup>1</sup>, Nesli Akinci<sup>1</sup>, Aldine Amiel<sup>2</sup>, Eric Röttinger<sup>2</sup>,  
5 Michael J. Layden<sup>1\*</sup>

6

7 <sup>1</sup> Lehigh University, Department of Biological Sciences, Bethlehem, PA

8 <sup>2</sup> Université Nice Sophia Antipolis UMR 7284, CNRS UMR 7284, INSERM U1081,  
9 Institute for Research on Cancer and Aging, Nice, France

10

11 \* Corresponding Author: [layden@lehigh.edu](mailto:layden@lehigh.edu)

12 Keywords: *Nematostella*, Regeneration, Neurogenesis, Nerve net, LWamide,  
13 Regenerative neurogenesis, Nervous system scalability

14

15

16

17

18

19

20

21

22

23

24

25

26

27

28

29

30

31

32 **Abstract:**

33 The cell dynamics and responses of individual neuronal cell types during whole-  
34 body axis regeneration are not well understood in any system. We exploited transgenic  
35 technology to track individual neuronal subtypes within regenerating *Nematostella*  
36 *vectensis* nerve nets *in vivo*. Individual neuronal subtypes had specific responses that  
37 included always, never, and conditional regeneration. Regenerates were smaller than the  
38 pre-amputated animal, and the nerve net was reduced in neuronal number. The reduced  
39 nerve net in regenerates led us to investigate whether the nerve net scaled with changes in  
40 body size. Neuronal number decreased as animals shrunk in response to starvation.  
41 Conversely, neurons increased in fed animals as they increased in length. The increase  
42 and decrease of neurons was reversible by switching fed animals to starvation and vice  
43 versa. Regenerates and starved/fed animals with scaled-down or scaled-up nervous  
44 systems responded to external mechanical cues. These data suggest that the *Nematostella*  
45 nerve net is dynamic, capable of scaling with changes to overall body size, and that  
46 individual neuronal subtypes display differential regenerative potential which is likely  
47 linked to the scale-state of regenerating nervous system.

48

49 **Introduction:**

50 How entire nervous systems reform in the context of whole-body axis  
51 regeneration is not well understood. Work in hydrozoan cnidarians and planarians have  
52 provided insights on some of the general molecular mechanisms that promote  
53 regenerative neurogenesis (Cebrià et al. 2002; Currie & Pearson 2013; Chen et al. 2013;  
54 Deochand et al. 2016; Gahan et al. 2017; Galliot et al. 2007; Miljkovic-Licina et al. 2007;  
55 Siebert et al. 2018; Roberts-Galbraith et al. 2016), but details about when and how  
56 individual neuronal subtypes respond are currently lacking. For example, it is currently  
57 unknown if all neuronal subtypes regenerate new neurons lost by amputation. In  
58 planarians, the total number of neurons for some neuronal fates positively correlates with  
59 the length of the animal (Takeda et al. 2009), but tracking individual neuronal fates *in*  
60 *vivo* in planarians is currently not feasible. As such it is not clear if neuronal number is  
61 dynamic within any one individual. The lack of understanding about the cellular  
62 dynamics during whole-body axis regeneration limits our ability to interpret functional

63 studies aimed at understanding the molecular mechanisms that re-pattern whole nervous  
64 systems.

65 The cnidarian sea anemone *Nematostella vectensis* offers the potential to track  
66 individual neuronal fates throughout the process of regeneration. *Nematostella* is an  
67 optically clear diploblastic animal. The primary axis is the oral-aboral axis. The oral pole  
68 possesses a single mouth surrounded by up to 16 tentacles (Fritz et al. 2013). Eight  
69 segments radially situated around the mouth run the length of the oral-aboral axis. Each  
70 radial segment contains a mesentery, which contains gonads, a number of differentiated  
71 cells, longitudinal tracts of neurites, and longitudinal myoepithelial cells (Tucker et al.  
72 2011; Renfer et al. 2010; Jahnel et al. 2014; Steinmetz et al. 2017; Williams 1975). The  
73 *Nematostella* nervous system is a typical cnidarian nerve net, which initially forms during  
74 embryonic and larval stages in both the ectoderm and endoderm (Rentzsch et al. 2016;  
75 Nakanishi et al. 2012). A number of transgenic lines exist, which allows for *in vivo*  
76 tracking of individual cell types (Layden et al. 2016; Nakanishi et al. 2012; Richards &  
77 Rentzsch 2014; Renfer et al. 2010; Havrilak et al. 2017; Busengdal & Rentzsch 2017).  
78 Using *in vivo* characterization of the *NvLWamide-like::mCherry* transgene, we identified  
79 at least five neuronal subtypes, determined that some of those neuronal subtypes form in  
80 a highly stereotyped manner, and that the number of some neuronal subtypes correlates  
81 with length (Layden et al. 2016; Havrilak et al. 2017).

82 Here, we exploited the ability to track individual neuronal subtypes using  
83 *NvLWamide-like::mCherry* transgenic animals during whole-body axis regeneration and  
84 during feeding and starvation treatments. *Nematostella* regenerates were smaller than  
85 their parent uncut animal, and their nervous systems had reduced numbers of at least  
86 some neuronal subtypes. Neurons were classified into at least three classes based on their  
87 specific regenerative responses: Class I neurons, which regenerated under all  
88 circumstances; Class II neurons, which did not appear to regenerate; and Class III  
89 neurons, which displayed differential regenerative potential that appeared to depend on  
90 the size of the remnant fragment. The reduced size of the regenerated nervous system led  
91 us to investigate scalability of the nerve net. Fed or starved *Nematostella* grew or shrunk  
92 respectively, and the nervous system responded in part by modifying the number of some  
93 neuronal subtypes to scale with changing polyp length. Despite their reduced nervous

94 systems, regenerates and animals that had been starved still responded to being touched  
95 and were capable of feeding, suggesting that the reduction does not inhibit functionality.  
96 These data suggest that the *Nematostella* nerve net is highly dynamic and scales with  
97 body size. To the best of our knowledge, these findings are the first evidence that  
98 regenerative responses of individual neurons are variable during whole-body axis  
99 regeneration. These data indicate that the molecular mechanisms enacted to promote  
100 regenerative neurogenesis likely vary based on the size of the remnant fragment and  
101 which neuronal subtypes must regenerate.

102

### 103 **Results:**

#### 104 **Neuronal subtypes display differential regenerative potentials.**

105 To determine how neuronal subtypes regenerate, our goal was to bisect animals  
106 into two equal halves (*Oral* and *Aboral* remnants) and measure the neuronal response in  
107 *Aboral* remnants (Figure 1A). We focused on *Aboral* remnants because there are  
108 morphological indicators for when regeneration has completed and a well-established  
109 regenerative time course (Passamaneck & Martindale 2012; Amiel et al. 2015; Bossert et  
110 al. 2013). One challenge was that animals do not always relax completely or uniformly  
111 along the oral-aboral axis when treated with MgCl<sub>2</sub>, and the wound site on both remnants  
112 curls in, which makes using measurements to ensure the cut site is always in the same  
113 position unreliable. However, the number of longitudinal neurons in the *NvLWamide-*  
114 *like::mCherry* transgenic animals scale with animal length and appear to be evenly  
115 distributed along the oral-aboral axis (Havrilak et al. 2017). We reasoned that if evenly  
116 distributed, quantifying longitudinal neurons pre- and post-amputation could be used as a  
117 proxy for length, and allow us to confirm amputation occurred in the intended location.  
118 The oral-aboral axis was divided into 4 equal quarters, and the longitudinal neurons were  
119 quantified in each quarter in animals of various lengths. Each quarter contained similar  
120 numbers of longitudinal neurons with no statistical difference between the numbers of  
121 neurons in any of the quarters (Figure 1B). Thus, we were justified in using longitudinal  
122 number to track amputation sites and as a proxy for length.

123 To quantify regeneration of individual neuronal subtypes we used animals that  
124 were 2.5 to 8.5 mm long (Supplemental Figure 1A), because this range represents the



125 sizes of naturally occurring wild-caught animals found along the East Coast of the United  
126 States (Adam Reitzel, personal communication, 11/2018). Animals in this size range also  
127 have a manageable number of longitudinal and tripolar neurons for quantification. We  
128 focused on longitudinal, tripolar, pharyngeal, and tentacular neuron subtypes described  
129 by the *NvLWamide-like::mCherry* transgene (Havrilak et al. 2017). Tentacular and  
130 pharyngeal neurons are specifically located at the oral end of the animal, whereas  
131 longitudinal and tripolar are evenly distributed along the oral-aboral axis in the endoderm  
132 and ectoderm, respectively (Figure 1C) (Havrilak et al. 2017; Layden et al. 2016). We  
133 excluded the *NvLWamide-like::mCherry*<sup>+</sup> mesentery neurons from this analysis. This is  
134 because the ruffled mesentery structure and large number of mesentery neurons made  
135 quantification unreliable. With the *NvLWamide-like::mCherry* line it is possible to easily  
136 score for the regeneration of oral specific neurons (tentacular and pharyngeal), as well as  
137 track regeneration of an individual neuronal subtype in both the endoderm and ectoderm.

138 To characterize neuronal subtype regeneration animals were allowed to relax,  
139 MgCl<sub>2</sub> was added to relaxed animals, and the number of longitudinal and tripolar neurons  
140 were quantified (*uncut*) (Figure 1C, F, and H). Animals were then bisected in half and  
141 longitudinal and tripolar neurons were quantified in the *Aboral* remnant (*time 0 cut*)  
142 (Figure 1D, F-I; Supplemental Figure 2). This process takes less than 20 minutes/animal.  
143 MgCl<sub>2</sub> was then washed out and animals were allowed to regenerate in 1/3x artificial sea  
144 water, (hereafter called *Nematostella* medium). Because extensive cell death occurs over  
145 the first 24 hours of regeneration (Warner et al. 2019), regenerating *Aboral* remnants  
146 were paralyzed using MgCl<sub>2</sub> and neuronal number was reassessed again at 24 hours post  
147 amputation (*24hpa*) (Figure 1F-I; Supplemental Figure 2). MgCl<sub>2</sub> was again washed out  
148 and animals were allowed to regenerate until 7 days post amputation (dpa) when neuronal  
149 numbers were quantified a final time (*7dpa*) (Figure 1E, F-I; Supplemental Figure 2). All  
150 oral structures including mouth, pharynx and tentacles regenerated in the aboral remnant  
151 by *7dpa* (Figure 1E; Supplemental Figure 3), which is consistent with previous findings  
152 and suggests that MgCl<sub>2</sub> treatments did not impact regenerative timing (Amiel et al. 2015;  
153 Passamaneck & Martindale 2012). Regenerates were reduced in size compared to pre-  
154 amputated animals, as indicated by a reduction in overall length (Figure 1 C and E;  
155 Supplemental Figure 1A-C) and decreased longitudinal and tripolar neuronal numbers

156 (Figure 1F-I; Supplemental Figure 2). On average regenerates from animals bisected at  
157 the midpoint were ~65% of their pre-amputated length at 7dpa, with the caveat that  
158 precise length measurements were difficult (Supplemental Figure 1A and B).  
159 Nevertheless, it is clear that regenerates did not return to their pre-cut length, and that  
160 longitudinal and tripolar neurons were decreased compared to the uncut starting number  
161 for all regenerates. We conclude that the nerve net of regenerates is reduced in terms of  
162 neuronal number compared to the uncut parental animal.

163 We observed pharyngeal and tentacular neuron regeneration in 100% of 7dpa  
164 regenerates (N = 73; Figure 1E; Supplemental Figure 3). Further characterization  
165 suggested that tentacular neurons were visible in the forming tentacle buds by 72hpa, and  
166 that pharyngeal neurons were first detected between 48 and 72hpa (Supplementary Figure  
167 3). We concluded that both tentacular and pharyngeal neurons regenerated and their  
168 regeneration coincides with the re-appearance of their corresponding tissues.

169 To better understand regeneration of longitudinal and tripolar neurons, which are  
170 present in both the *Aboral* remnant and regenerates, we quantified changes in neuronal  
171 number throughout regeneration (Figures 1F-I). Since the number of longitudinal neurons  
172 never returned to the initial starting numbers in any of the animals, we focused our  
173 investigation on the time between when they were cut (*time 0 cut*) and after they fully  
174 regenerated (7dpa) (Figures 1 G and I, boxed regions in F and H, respectively).

175 We initially treated all regenerates equal regardless of size, but observed  
176 differential regeneration of longitudinal neuronal subtypes that appeared to be size  
177 dependent. For the remainder of analysis we will describe the longitudinal and tripolar  
178 regeneration in four different size groups, based on the starting number of longitudinal  
179 neurons present in the uncut animal. We categorized animals as small (20-40 longitudinal  
180 neurons or ~2.5-5 mm), medium (41-60 longitudinal neurons or ~3.5-5.5 mm), medium-  
181 large (61-80 longitudinal neurons or ~5-7.5mm), and large (81-100 longitudinal neurons  
182 or ~6.5-8.5 mm) (Supplemental Figure 1A). Both size and longitudinal number were used  
183 to classify animals for the reasons discussed above.

184 Longitudinal neurons regenerated in small and medium animals, but not medium-  
185 large or large animals. Between *time 0 cut* and 24hpa the number of longitudinal neurons  
186 initially decreased in all size groups (Figure 1G, all  $p < 0.001$ ), likely due to increased

187 apoptosis that occurs over the first 24hpa (Warner et al. 2019). The number of  
188 longitudinal neurons significantly increased between 24hpa to 7dpa in small and medium  
189 animals ( $p < 0.001$  and  $p = 0.001$ , respectively). The numbers of longitudinal neurons in  
190 7dpa regenerates were statistically similar to the numbers observed in *time 0 cut* animals  
191 for both small and medium groups (small:  $p = 0.77$ , medium:  $p = 1.00$ ), suggesting  
192 longitudinal neurons regenerated back to their numbers present in the remnant fragment  
193 at the time of bisection (Figure 1G, red and green lines). No regeneration of longitudinal  
194 neurons was observed in medium-large and large animals between 24hpa and 7dpa  
195 (Figure 1G, yellow and blue lines;  $p = 0.249$  and  $p = 1.00$ , respectively). Despite the  
196 differences in regenerative potentials of the longitudinal neurons, there was no significant  
197 difference in the percent length of regenerates at 7dpa relative to their starting size  
198 (Supplemental Figure 1B).

199 In contrast to longitudinal neurons, there was no regeneration of tripolar neurons  
200 in any of the animal size groups. The number of tripolar neurons decreased between *time*  
201 *0 cut* and 24hpa (Figure 1I,  $p < 0.001$ ) but failed to return to the *time 0 cut* numbers by  
202 7dpa (Figure 1I,  $p < 0.001$ ).

203 We conclude that longitudinal neurons display differential regenerative potential  
204 that corresponds to the size of the pre-amputated animal, and that tripolar neurons do not  
205 demonstrate any regenerative potential.

206

### 207 **Differential regenerative potential of longitudinal neurons depends on the size of the** 208 **remnant fragment.**

209 We wondered what was influencing the variable regenerative potential of  
210 longitudinal neurons. All animals, including our large group animals (Supplemental  
211 Figure 4), show increased proliferation in both the ectoderm and endoderm of  
212 regenerating tissue. This observation is consistent with the finding that *Nematostella*  
213 regeneration has been described to be dependent on cell proliferation (Amiel et al. 2015;  
214 Passamaneck & Martindale 2012). Two obvious factors that might influence the  
215 regenerative potential of longitudinal neurons are the animal's pre-amputation size or the  
216 size of the *Aboral* remnant. If the remnant size plays a role in regenerative potential, then  
217 shifting the amputation site in large and small animals to create larger or smaller remnant

218 fragments should alter the regenerative potential of longitudinal neurons. However, if the  
219 animal's pre-amputation size dictates regenerative potential, then altering the amputation  
220 site should not alter regenerative potential of longitudinal neurons.

221         When smaller *Aboral* fragments were generated from large animals by aborally  
222 shifting the amputation site to remove 75% of the oral-aboral axis (Figure 2A),  
223 longitudinal neurons regenerated between *24hpa* and *7dpa* (Figure 2C,  $p = 0.046$ ).  
224 Interestingly, the remnant fragment generated by the aboral shift resulted in a similar  
225 number of longitudinal neurons at *time 0 cut* and *24hpa* as the fragment from medium  
226 animals bisected into equal halves (Figure 2D, compare black and faded green lines).  
227 Alternatively, orally shifting the amputation site of medium sized animals to remove only  
228 25% of the oral-aboral axis (Figure 2B) increased the remaining number of remaining  
229 longitudinal neurons at *24hpa* similar to those remaining in medium-large and large  
230 animals bisected into two equal halves (Figure 2 E and F, compare black and faded blue  
231 and yellow lines), and similarly resulted in no longitudinal neuron regeneration between  
232 *24hpa* and *7dpa* ( $p = 1.00$ ). When the amputation site of small animals is orally shifted  
233 (Figure 2B), the increased *Aboral* remnant fragment has a similar number of remaining  
234 longitudinal neurons as the fragment generated by bisecting a medium animal into two  
235 equal halves (Figure 2G and H, black lines). Longitudinal neurons showed a trend  
236 towards regeneration in small animals with an orally shifted amputation site, similar to  
237 the medium sized animals (Figure 2G, H, compare black and faded green lines) but the  
238 increase in number between *24hpa* and *7dpa* was not statistically significant ( $p = 0.469$ )  
239 However, the number of neurons at *7dpa* is also not statistically significant from the  
240 number at *time 0 cut*, ( $p = 0.119$ ), but the *time 0 cut* and *24hpa* values are different ( $p <$   
241  $0.001$ ), suggesting that the trend towards regeneration is real and that variability in  
242 responses of small animals by *7dpa* are the source for lack of statistical significance.

243         The size of the remnant fragment appears to play a larger role in dictating the  
244 regenerative potential of longitudinal neurons than the starting size of the pre-amputated  
245 animal. Overall, these data suggest there are at least three regenerative responses for  
246 neuronal subtypes in *Nematostella*. Class I neurons that regenerate 100% of the time  
247 following amputation (tentacular and pharyngeal *NvLWamide-like* neurons); Class II  
248 neurons, which do not regenerate by *7dpa* (tripolar *NvLWamide-like* neurons); and Class

249 III neurons that have differential regenerative abilities likely controlled in part by the size  
250 of the remnant fragment (longitudinal *NvLWamide-like* neurons).

251

252 **Longitudinal and tripolar neuron numbers are dynamic and scale with size in adult**  
253 **animals.**

254 The reduced size of the regenerated nerve net following amputation led us to  
255 investigate scalability. The number of longitudinal and tripolar neurons positively  
256 correlate with animal length during growth from juvenile polyps into adult stages  
257 (Havrilak et al. 2017). Because regenerates are smaller than pre-amputated animals, and  
258 the number of longitudinal and tripolar neurons are reduced in regenerates (Figures 1 and  
259 2; Supplemental Figure 2), we wondered if longitudinal and tripolar numbers might  
260 fluctuate in adult animals as they grow and shrink in size. *Nematostella* increase in size  
261 when fed (Figure 3 A, B, and G)(Hand & Uhlinger 1992; Layden et al. 2016), and our  
262 observations demonstrate that they decrease in size when starved (Figure 3A, B, and G).  
263 Thus, we set out to determine if tripolar and longitudinal neuronal numbers are dynamic  
264 in adults that are increasing and decreasing in size.

265 To compare responses, we performed two replicate experiments that varied the  
266 number of starting longitudinal and tripolar neurons and therefore the starting size of the  
267 animals (Figure 3, smaller animals; Supplemental Figure 5, larger animals). The initial  
268 experimental design was to track neuronal number in animals over fourteen weeks.  
269 Animals would be either starved or fed for seven weeks, then the feeding regimen would  
270 be changed for the remaining seven weeks. However, we found our largest animals that  
271 were initially fed (the feed-starve treatment group) became too large to accurately count  
272 within the time constraints of our paralytic after 3 weeks into our feeding regimen. We  
273 therefore switched the animals to starvation for the remaining 11 weeks in both  
274 independent experiments (Figure 3; Supplemental Figure; black lines).

275 After the initial 3 weeks of feeding, the fed then starved animals (Figure 3 and  
276 Supplemental Figure 5, black lines) had significantly increased in length (Figure 3A and  
277 G,  $p = 0.008$ ), and the number of both longitudinal neurons (Figure 3C and D;  
278 Supplemental Figure 5A and B;  $p < 0.001$  for both) and tripolar neurons (Figure 3E and  
279 F,  $p = 0.32$ ; Supplemental Figure 5C and D,  $p < 0.001$ ) significantly increased. Following

280 the switch to a starvation regime, the fed then starved animals significantly shrunk in size  
281 after 11 weeks (Figure 3A and G,  $p = 0.008$ ), and lost a significant number of  
282 longitudinal (Figure 3C and D,  $p = 0.003$ ; Supplemental Figure 5A and B,  $p = 0.001$ ) and  
283 tripolar neurons (Figure 3E and F,  $p = 0.031$ ; Supplemental Figure 5C and D,  $p < 0.001$ ).

284 Animals placed on the opposite feeding regime had opposite effects on their size  
285 and neuronal number (Figure 3B-G; Supplemental Figure 5A-D, blue lines). The animals  
286 that were initially starved for 7 weeks (starved then fed group) got smaller in size (Figure  
287 3B) and their measured length showed a trend toward a shorter length (Figure 3G,  $p =$   
288 0.098), suggesting the animal is slower to shrink in size than grow. Starved then fed  
289 animals showed significant decreases in longitudinal neurons during the starvation  
290 regime (Figure 3C and D,  $p = 0.004$ ; Supplemental Figure 5A and B;  $p = 0.031$ ). Tripolar  
291 neurons significantly decreased in the animals that were initially smaller to start (Figure  
292 3E and F,  $p = 0.029$ ), and their decrease approached significance in animals that were  
293 larger to start (Supplemental Figure 5 C and D,  $p = 0.094$ ). When switched to feeding, the  
294 starved then fed animals significantly increased in size (Figure 3B, 3G,  $p < 0.001$ ) and  
295 both neuronal subtypes significantly increased in number (Figure 3C-F, Supplemental  
296 Figure 5 A-D;  $p \leq 0.001$  for all).

297 We conclude that *Nematostella* scales at least part of its nervous system by  
298 altering neuronal subtype number coincidentally with increases or decreases in its size.

299

### 300 **Increased Caspase 3 activity in neuron-like cells is observed in starved animals**

301 Increase in neuronal number is due to birth of new neurons, and increased  
302 apoptosis is the most likely cause for decrease in neuronal number. To assess if the loss  
303 of neurons in starved animals is correlated with increased apoptosis, we stained fed and  
304 starved animals with an  $\alpha$ -Caspase 3 antibody that recognizes the p17 fragment of active  
305 Caspase-3, a potential marker of apoptosis. Caspase-3 is an effector of the apoptosis  
306 pathway (Elmore 2016) and has been identified as a key mediator in neuronal  
307 programmed cell death (D'Amelio et al. 2012; Kuida et al. 1996). The *Nematostella*  
308 genome possesses at least three *caspase 3* orthologs (Moya et al. 2016). Using the active  
309 Caspase-3 antibody on fed *versus* 3-week starved animals, we observed activated  
310 Caspase 3 staining in 15 out of 15 of starved animals (Figure 4), which is in contrast to



311 the Caspase-3 staining only being observed in 2 of the 16 fed animals. Activated  
312 Caspase-3 was detected in cells located along the longitudinal tracts of starved animals  
313 (Figure 4E-H, arrow), as well as in cells throughout the body column of starved animals  
314 (Figure 4E-H, arrowhead). Interestingly, some of the activated Caspase3 positive cells  
315 had a neuronal-like morphology, suggesting that neuronal death does occur during  
316 periods of starvation.

317 Our data suggest that apoptosis is not only playing a role in the loss of cells,  
318 including some neuron populations in the starved animals, but also that apoptosis is  
319 restricted primarily to the physa, which is the most aboral region of the body. We  
320 conclude that starvation induces an increase in Caspase 3 activity in neuronal and non-  
321 neuronal cells, which suggests that decreases in animal size are due to induced cell death.  
322

### 323 **Scaled down nervous systems maintain the ability to respond to external cues**

324 Lastly, we wondered if the *Nematostella* nervous system retained function in each  
325 scale state. However, *Nematostella* are known to retract when challenged with a  
326 mechanical stimulus. Thus, we decided to determine if *Nematostella* retained the ability  
327 to respond to mechanical cues in different scale states. Because there are no quantified  
328 behavioral assays available yet in *Nematostella*, we developed an action-reaction Poking  
329 assay using a toothpick to induce a reaction response. Poking an animal near the tentacles  
330 induced a contraction of the animal away from the stimulus (see Supplemental Movies 1-  
331 6). Each animal was poked three times in the most oral region of the body, and a positive  
332 response was scored when the animal retracted their tentacles and/or their body at least  
333 once in response to being poked. We observed variable responses to the Poking assay  
334 (anywhere from entire body retraction to only retracting 1-2 tentacles). Therefore any  
335 attempt to move their body away from the toothpick was classified as a positive response.

336 We first examined the behavioral response in pre- and post- regenerated animals  
337 (Figure 5; Table 1). For all the cases (N = 8), the same animal responded to the Poking  
338 assay both pre-bisection (Figure 5A-D) and 7dpa (Figure 5E-H; Table 1). After  
339 regeneration, the nerve net and the number of neurons it contained were decreased  
340 compared to the initial non-bisected body (Figures 1 and 2; Supplemental Figure 2). The  
341 maintenance of the behavioral response in the regenerated animal suggests that the

342 reduction in the nervous system size did not limit the animal's ability to coordinate a  
343 response to external mechanical cues.

344 We next performed the Poking assay in fed *versus* starved animals (Figure 6;  
345 Table1). We observed that animals starved (6-7 weeks) or fed (3 weeks) both responded  
346 to the Poking assay (Figure 6A-E, H-M; Table 1). As expected, we observed a significant  
347 decrease of the numbers of longitudinal and tripolar neurons in the starved animals  
348 (Figures 6F and G) and a significant increase in these neuronal numbers in the fed  
349 animals (Figure 6N and O). We conclude that retraction in response to a mechanical cue  
350 behavior is not dependent on the size of the nervous system. These preliminary findings  
351 suggest that the neurocircuitry for at least some behaviors are retained regardless of the  
352 overall size of the nerve net.

353

#### 354 **Discussion:**

355

#### 356 **Variability in regenerative potential of individual cell types during whole-body axis** 357 **regeneration.**

358 This study represents the first study we are aware of to track neuronal subtype  
359 regeneration *in vivo* in individuals undergoing whole-body axis regeneration. We found  
360 that individual neuronal subtypes have differential potential to regenerate new neurons,  
361 and this is based in part on the size of the remnant fragment. We therefore grouped  
362 neurons into three classes based on regenerative response. Class I neurons that  
363 regenerated 100% of the time, Class II neurons that did not regenerate following  
364 amputation, and Class III neurons, which are perhaps the most interesting, because they  
365 are capable of regenerating under some but not all circumstances. We were initially  
366 concerned that the lack of regeneration observed in Class II and sometimes Class III  
367 neurons was due to delayed regeneration, particularly in larger animals. Regeneration  
368 occurred within seven days regardless of the size of the animal. Larger animals would  
369 need to regrow more tissue to go from ~50% (following amputation) to ~65% pre-cut  
370 length (after regeneration) (Supplemental Figure 1). To accomplish this, they would need  
371 to proliferate more rapidly than smaller animals and an increase in proliferation rates  
372 could delay longitudinal differentiation, whereas tripolar regeneration could be delayed in



373 all cases. We did check regenerates at 12 and 14dpa and we saw no change from the  
374 neuronal numbers observed at 7dpa (data not shown), suggesting that there is no delay in  
375 longitudinal specification in larger animals nor any delay in tripolar regeneration. We  
376 argue that there is fundamental difference in why longitudinal neurons regenerate in  
377 smaller but not larger remnant fragments, and that Class II and Class III neurons are both  
378 part of the normal regenerative response.

379 It is likely that all three neuronal classes described here are present in other  
380 animals. Class I neurons were neurons that were present in structures that needed to  
381 completely reform in regenerates. Within planarian whole-body axis regeneration, Class I  
382 neurons would likely be any of the neuronal subtypes present specifically in the brain or  
383 eyes that needed to regenerate following amputation of anterior regions. It is not clear  
384 how widespread the presence of Class II neurons is in animals, because tracking of  
385 individual neuronal subtypes during regeneration in the same animal has not been  
386 reported in planarians or *Hydra*. Given that both planarians and *Nematostella* have been  
387 shown to have nervous systems that scale with size (Figures 3; Supplemental Figure 5)  
388 (Takeda et al. 2009), it is likely that Class II neurons are not a *Nematostella* specific  
389 phenomenon. It should be noted that Class II neurons are capable of regenerating in some  
390 regenerative paradigms. Tripolar neurons that were lost as animals shrunk during  
391 starvation repopulated in animals that regrew once they were switched back to feeding  
392 (Figure 3 and Supplemental Figure 5). This suggests that the regenerative potential of any  
393 neuronal subtype is not uniform across all regeneration paradigms. There is evidence for  
394 Class III-like regenerative potential in other animals. For example, populations of  
395 dopaminergic neurons in the brains of adult zebrafish have been shown to be diverse in  
396 their regenerative capacity (Caldwell et al. 2019). Based on the fact that regenerates are  
397 smaller than the pre-cut animal, that degrees of nervous system scaling is likely common  
398 in animals, and that some amputations result in complete loss of some neuronal subtypes,  
399 we predict that all three neuronal classes are common to all animals that undergo whole-  
400 body axis regeneration.

401

402 ***Nematostella* nervous system scales with animal length.**

403 *Nematostella* modulated the size of its nerve net by increasing or decreasing  
404 neuronal number in response to feeding or starvation periods, and these changes were  
405 reversible (Figure 3). The correlation between neuronal number and body size suggests  
406 that *Nematostella* scales its nervous system with its body size. Importantly, *Nematostella*  
407 maintains normal behaviors in each scale state (Figures 5 and 6). The potential scalability  
408 of nervous systems has been suggested by studies using molecular markers to track  
409 neuronal subtypes in planarians. Specific cell types, including visual cells and neural cells  
410 in the brain, were shown to correlate with body length, and there is also a constant ratio  
411 maintained between several types of neurons in the brain regardless of overall number  
412 (Takeda et al. 2009). Although this planarian study was performed in fixed animals, their  
413 findings are consistent with the dynamic and scalable nervous system found in  
414 *Nematostella*. It should be noted that we did not address, and do not we rule out, that the  
415 *Nematostella* nervous system may also scale by modulating connectivity of existing  
416 neurons.

417 During both regeneration and body scaling, *Nematostella* retains normal body  
418 form (Figures 1 and 3), the ability to respond to a mechanical cue (Figures 5, 6), and the  
419 ability to eat (Passamanek & Martindale 2012; Layden et al. 2016). Additionally, even  
420 with a smaller nerve net, we can infer that these animals are telling the difference  
421 between a potential predator (toothpick) and prey (brine shrimp), because while the  
422 animals responded to the Poking assay with a defensive retraction, they readily capture  
423 and ingest the food. Taken together these observations suggest that the nervous system is  
424 functional in all scale states.

425

426 **Nervous system scalability may influence regenerative potential of neuronal**  
427 **subtypes.**

428 The fact that nervous systems scale with size in *Nematostella*, and that  
429 regenerates are smaller than pre-cut animals, suggests that the differential regenerative  
430 responses of individual neurons are linked to the scale state of the regenerate. The two  
431 neuronal subtypes that we confirmed have reduced numbers in regenerates are the  
432 longitudinal (Class III) and tripolar neurons (Class II). Coincidentally, the total number of  
433 neurons for both of these neuronal subtypes correlate with overall length and scale in

434 number as animal length increases or decreases (Figure 3; Supplemental Figure  
435 5)(Havrilak et al. 2017). While it is logical that regenerates that are smaller than the pre-  
436 cut animal have less tripolar and longitudinal neurons, it is not clear why tripolar neurons  
437 do not show regenerative potential, but longitudinal neurons do under some  
438 circumstances. One possible explanation for why tripolar neurons do not regenerate is  
439 that the number of neurons present in the *Aboral* remnant are within an acceptable range  
440 for the scale state of the regenerate. As a result, tripolar neurons do not need to increase  
441 in numbers as part of a regenerative response. An alternative explanation is that  
442 regeneration of tripolar neurons may not be necessary because they may function  
443 similarly to tentacular neurons. Tripolar and tentacular neurons are both ectodermal  
444 neurons that share a similar morphology (Havrilak et al. 2017). The reduced size of  
445 regenerates suggests that the majority of regenerated tissue is contributing to pharyngeal  
446 and tentacular structures. If tentacular neurons have a similar function to the tripolar  
447 neurons they may compensate until the regenerate starts to feed and tripolar neurons  
448 begin populating the body column with growth. However, it should be noted that tripolar  
449 and tentacular neurons are specified at different times during development (Havrilak et  
450 al. 2017), and the tissues they arise from have distinct gene expression profiles of  
451 transcription factors known to pattern neuronal fates in *Nematostella* and traditional  
452 model systems (Layden et al. 2010; Sinigaglia et al. 2013; Leclère et al. 2016; Marlow et  
453 al. 2013; Röttinger et al. 2012). Thus, it isn't clear if they are similar neurons that are  
454 patterned using variable molecular programs during development, or if they are distinct  
455 neuronal fates.

456         The differential response of longitudinal neuron regeneration observed in  
457 different sized remnant fragments is interesting. We have thought of two hypotheses to  
458 explain the response. The first hypothesis is simply that the scale state of longitudinal  
459 neurons is different than that of tripolar neurons, and that in smaller remnants the number  
460 of longitudinal neurons is below a minimum threshold, which results in induction of  
461 regenerative response after amputation. In larger fragments, the number of longitudinal  
462 neurons is above the minimum threshold for the new scale state of the nervous system,  
463 and thus no regenerative response is induced. The alternative hypothesis is that there are  
464 differences in regenerative mechanisms between large and smaller animals. Although cell

465 proliferation is required for *Nematostella* oral regeneration (Passamaneck & Martindale  
466 2012), some remodeling of remnant tissue occurs (Amiel et al. 2015). These findings  
467 suggest *Nematostella* uses a hybrid of cell proliferation and morphallaxis to regenerate.  
468 EdU labeling suggests that larger animals are still regenerating using both cell  
469 proliferation and morphallaxis, but perhaps they shift mechanisms to favor morphallaxis  
470 and smaller animals favor cell proliferation. Future experiments to help distinguish  
471 between potential different mechanisms of regeneration based on animal size should be  
472 done to better understand *Nematostella* regeneration. Our limited studies favor the  
473 threshold scale model. First, we did not observe additional longitudinal neurons in  
474 regenerates from large animals bisected in half at 14dpa. Even if large animals do rely  
475 more heavily on morphallaxis, they are still increasing in size at equal proportions to  
476 small animals. Thus, the prediction is that longitudinal neurons should increase in number  
477 unless there is a sufficient number of neurons to be at the "low" end of the acceptable  
478 scale state in the regenerate. Additionally, when cut sites were shifted the regenerative  
479 response of the remnant tissue was dictated by its size. This suggests that there are  
480 particular scale states that need to be maintained in different sized animals. Regardless of  
481 the exact mechanism, the data support the hypothesis that once we identify the key ratio  
482 of neuronal number to length for a particular neuronal subtype, it should be possible to  
483 predict its regenerative response based on the size and number of neurons present in the  
484 remnant fragment.

485

#### 486 **Scalability of adult *Nematostella* nerve net**

487 *Nematostella* must have a mechanism to sense and regulate the ratio of neuronal  
488 number to body size. Possible mechanisms include the nervous system self-regulating  
489 subtype numbers autonomously, or that neural numbers are influenced by signaling from  
490 neural and other tissues/cell types within the body. It is unlikely that changes in size also  
491 influence the amount of other cell types besides neurons. Non-neuronal cells had  
492 detectable activated Caspase-3 (Figure 4), which suggests other cell types decrease as the  
493 animal length decreases during starvation. This is similar to observations in planarians  
494 where an overall increase or decrease in cell number across multiple cell types  
495 corresponds to larger or smaller length, respectively (Baguna et al. 1981; Romero &

496 BAGUÑA 1991; Takeda et al. 2009; Oviedo et al. 2003). The global change of other  
497 neuronal cell types suggests that signaling between cell types may coordinate scaling of  
498 the entire animal simultaneously. One example of regulation of cell number being  
499 mediated by signaling between different cell types is the regulation of hematopoietic stem  
500 cell number by Notch and BMP signaling from osteoblasts (Zhang et al. 2003; Bowers et  
501 al. 2015; Calvi et al. 2003). However, microglia have been shown to self-regulate their  
502 numbers during periods of resolution following neurodegeneration in both zebrafish (van  
503 Ham et al. 2014) and mice (Tay et al. 2017). This occurs via cell egress and apoptosis  
504 (Tay, 2017), and phagocytosis of disease state microglia undergoing apoptosis by other  
505 viable/healthy microglia has also been demonstrated (van Ham, 2014). At this point it is  
506 unclear if scaling of the nervous system occurs autonomously, is directed by signaling  
507 from other tissues, or via both mechanisms. Future work characterizing *Nematostella*  
508 growth and shrinking and the scaling responses of differentiated cell types is an exciting  
509 potential area of research.

510

### 511 **Conclusion:**

512 The ability to observe and quantify individual neuronal subtypes makes  
513 *Nematostella* a powerful model to investigate neurogenesis in the context of both  
514 regeneration and whole-body scaling. Our data suggest that the regenerative responses of  
515 neuronal subtypes in *Nematostella* are variable and depend both on individual subtypes  
516 and the size of the remnant fragment. These data imply that there is differential  
517 deployment of the molecular pathways that specify specific subtypes that may be  
518 dependent on the scale-state of the nervous system in the regenerate. How *Nematostella*  
519 controls the generation and incorporation of new neurons into the existing nerve net, and  
520 how they scale the numbers of these neurons to body size in real time remains an  
521 unknown, but both are exciting areas for future investigation. Lastly, our data suggest that  
522 experiments aimed at uncovering the molecular mechanisms regulating neural  
523 regeneration in *Nematostella* require careful consideration of the differential regenerative  
524 potential of individual neuronal subtypes when designing experiments and interpreting  
525 results.

526

527 **Methods:**

528

529 **Animal care**

530 All animals were kept at room temperature and fed rotifers or crushed brine  
531 shrimp until they reached the young juvenile adult stage, at which time they were  
532 transferred to 17°C and switched to solely brine shrimp. All juvenile adult and adult  
533 animals were housed at 17°C in the dark and fed brine shrimp 4x/week, unless otherwise  
534 noted for experimental purposes. *Nematostella* were maintained in 1/3x artificial sea  
535 water, (*Nematostella* medium) at a pH of 8.1-8.2 that was changed once per week.

536 *Nematostella* were relaxed in 7.14% (wt/vol) MgCl<sub>2</sub> in *Nematostella* medium for  
537 ~10 minutes prior to quantification, imaging, or bisection. The lengths of relaxed animals  
538 were measured in mm with a ruler placed under a Petri dish containing the animal.

539

540 **Quantification of NvLWamide-like::mCherry-expressing neurons**

541 *NvLWamide-like::mCherry* tripolar and longitudinal neurons were counted on live  
542 animals under a dissection microscope (Nikon SMZ1270), on live animals placed under a  
543 slide with a raised coverslip on a compound microscope (Nikon NTi), or on full-length  
544 images of *Nematostella*. All quantifications of longitudinal and tripolar neurons were  
545 obtained by counting the neurons from 2-4 segments on each individual animal that were  
546 then averaged together.

547

548 **Regeneration experiments**

549 Longitudinal and tripolar neurons were quantified first on the uncut animal, then  
550 immediately following bisection (time 0 cut), 24 hours post amputation (hpa), and 7 days  
551 post amputation (dpa). Animals were either bisected in half with the cut site at oral-aboral  
552 midpoint (~50% body removed), bisected below the pharynx (“oral shift”, ~25%  
553 removed), or bisected at the aboral end (“aboral shift”, ~75% removed). Following  
554 quantification and/or bisection, the remnant aboral fragment was washed with  
555 *Nematostella* medium, then placed in the dark at room temperature. Prior to  
556 quantification, animals were starved 4 days (Amiel et al. 2015; Passamaneck &  
557 Martindale 2012). Animals were not fed for the duration of the experiment.

558

### 559 **Feed/Starve experiments**

560 For each animal, the number of longitudinal and tripolar neurons were counted at  
561 Time 0, at the time of their feeding regime switch (starved to fed, 6-7 weeks later; fed  
562 then starved 3 weeks later), and at the end of the 14 week experiment. All animals were  
563 maintained on the same normal feeding schedule until Time 0 of the experiment. At this  
564 time animals were randomly assigned to either the starve-feed group or feed-starve  
565 group, then they were imaged, and their initial starting neural counts were taken. Animals  
566 on the feeding regime were fed brine shrimp 2x/week plus oyster 1x/week, and were  
567 given weekly water changes.

568

### 569 **Poking assay**

570 Animals were transferred to a depression slide containing *Nematostella* medium.  
571 Once the animal had relaxed its tentacles a toothpick was slowly inserted into the  
572 medium so as to not disturb the animal prematurely. The animal was then “poked” with  
573 the tip of the toothpick at the oral region. The entire assay was video recorded and  
574 analyzed to determine the animal’s response. Following the “Poking assay”, the animal  
575 was left alone in the dish until it relaxed again, upon which the Poking assay was  
576 performed again. The assay was performed 3 consecutive times. A positive response was  
577 determined if the animal responded to being touched with a toothpick by retracting some  
578 or all of its tentacles, scrunching or retracting in its mouth (oral region) or retracting its  
579 entire body. To be considered responsive the animal had to react in at least 1 out of the 3  
580 poking assays performed.

581

### 582 **EdU Stain**

583 EdU incorporation was carried out as previously described with modifications  
584 (Fritz et al. 2013). Animals were incubated with 330uM EdU in *Nematostella* medium for  
585 30 minutes, then fixed as previously described (Fritz et al. 2013) and dehydrated to 100%  
586 MeOH and stored at -20 °C. Following rehydration, samples were permeabilized in PBT  
587 (PBS with 0.5% Triton X-100, Sigma) for ~2 hours. Animals were then treated with the  
588 reaction cocktail (prepared following the Click-It protocol provided by the manufacturer,



589 with the exception of doubling the amount of Alexa Fluor azide) at room temperature in  
590 the dark for 20 minutes. Following 5 long washes in PBT the animals were labeled with  
591 propidium iodide for 1 hour while rocking, washed 5X in PBT and finally transferred to  
592 90% glycerol for imaging.

593

### 594 **Immunohistochemistry for activated Caspase-3**

595 Preparation for staining was carried out as previously described (Amiel et al.  
596 2015). To analyze for activated Caspase-3 (apoptosis stain), we used a polyclonal rabbit  
597 active Caspase-3 antibody (ABCAM, ab2302). Secondary Alexa Fluor 488 donkey anti-  
598 rabbit (Life Technologies, A21206) was used.

599

### 600 **Imaging**

601 Live images of *NvLWamide-like::mCherry*-expressing animals were taken on a  
602 Nikon NTi with a Nikon DS-Ri2 color camera with Nikon Elements software. Large full-  
603 length images are comprised of several images stitched together. Confocal images were  
604 captured using a Zeiss LSM 880 with LSM software and processed using Imaris 8.4.1  
605 software (Bitplane LLC) to create 3D images from serial optical sections (z-stacks).  
606 Images were then cropped and assembled using Photoshop and Illustrator (Adobe).

607 Live video was captured on a Nikon Eclipse E1000 microscope with Nikon  
608 Imaging software. Movies were processed with ImageJ/Fiji software and screen shots  
609 were obtained from individual frames, then cropped and assembled using Adobe  
610 Photoshop and Illustrator.

611

### 612 **Statistical analysis**

613 For the regeneration and feed/starve experiments, mixed analysis of variance  
614 (ANOVA) tests were used to analyze each dependent variable (i.e. the number of  
615 longitudinal and tripolar neurons quantified). For both experiments, each observation of  
616 an individual over time served as the within-subject factor (Regeneration experiment:  
617 time 0 cut, 24hpa, 7dpa; Feed/starve: week 1, week of feeding regime switch, week 14).  
618 The between subject factors used were animal size category (small: 20-40mm, medium:  
619 41-60mm, medium-large: 61-80mm, large: 81-100mm) and assigned feeding group



620 (Feed-Starve or Starve-Feed) for the regeneration and feed/starve experiments  
621 respectively. A mixed ANOVA was also used to analyze changes in oral-aboral length  
622 during the feed/starve experiment, with each observation of an individual serving as the  
623 within-subject factor (week 1, week of feeding regime switch, and week 14) and assigned  
624 feeding group as the between-subject factor (Feed-Starve or Starve-Feed). Data used for  
625 ANOVA tests met assumptions of normality and homogeneity. Greenhouse-Geisser  
626 corrected F-statistics were reported if sphericity was violated (i.e. Figure 1I). When  
627 omnibus ANOVA results were significant, post-hoc testing was performed using  
628 Bonferroni corrections in order to maintain tight control over the type 1 error rate. Effect  
629 sizes are reported as partial  $\eta^2$  ( $\eta_p^2$ ). Full ANOVA model results are reported in  
630 Supplemental Document 1. Paired t-tests were used to compare individual changes in the  
631 number of neurons or length at two time points. All data were analyzed using SPSS  
632 version 21.0.

633

#### 634 **Acknowledgements**

635 We would like to thank David Balli and Omar Ahmed for providing help with R  
636 software and construction of the line graphs. We also thank Dylan Faltine-Gonzalez,  
637 Noor Baban, and Brianna Maslonka for their help with maintenance of the animal stocks.  
638 This work was funded by the National Institutes of Health Award Number  
639 R01GM127615.

640

#### 641 **Competing Interests Statement**

642 The authors declare that they have no financial or non-financial competing interests

643

644

645

646

647

648

649

650

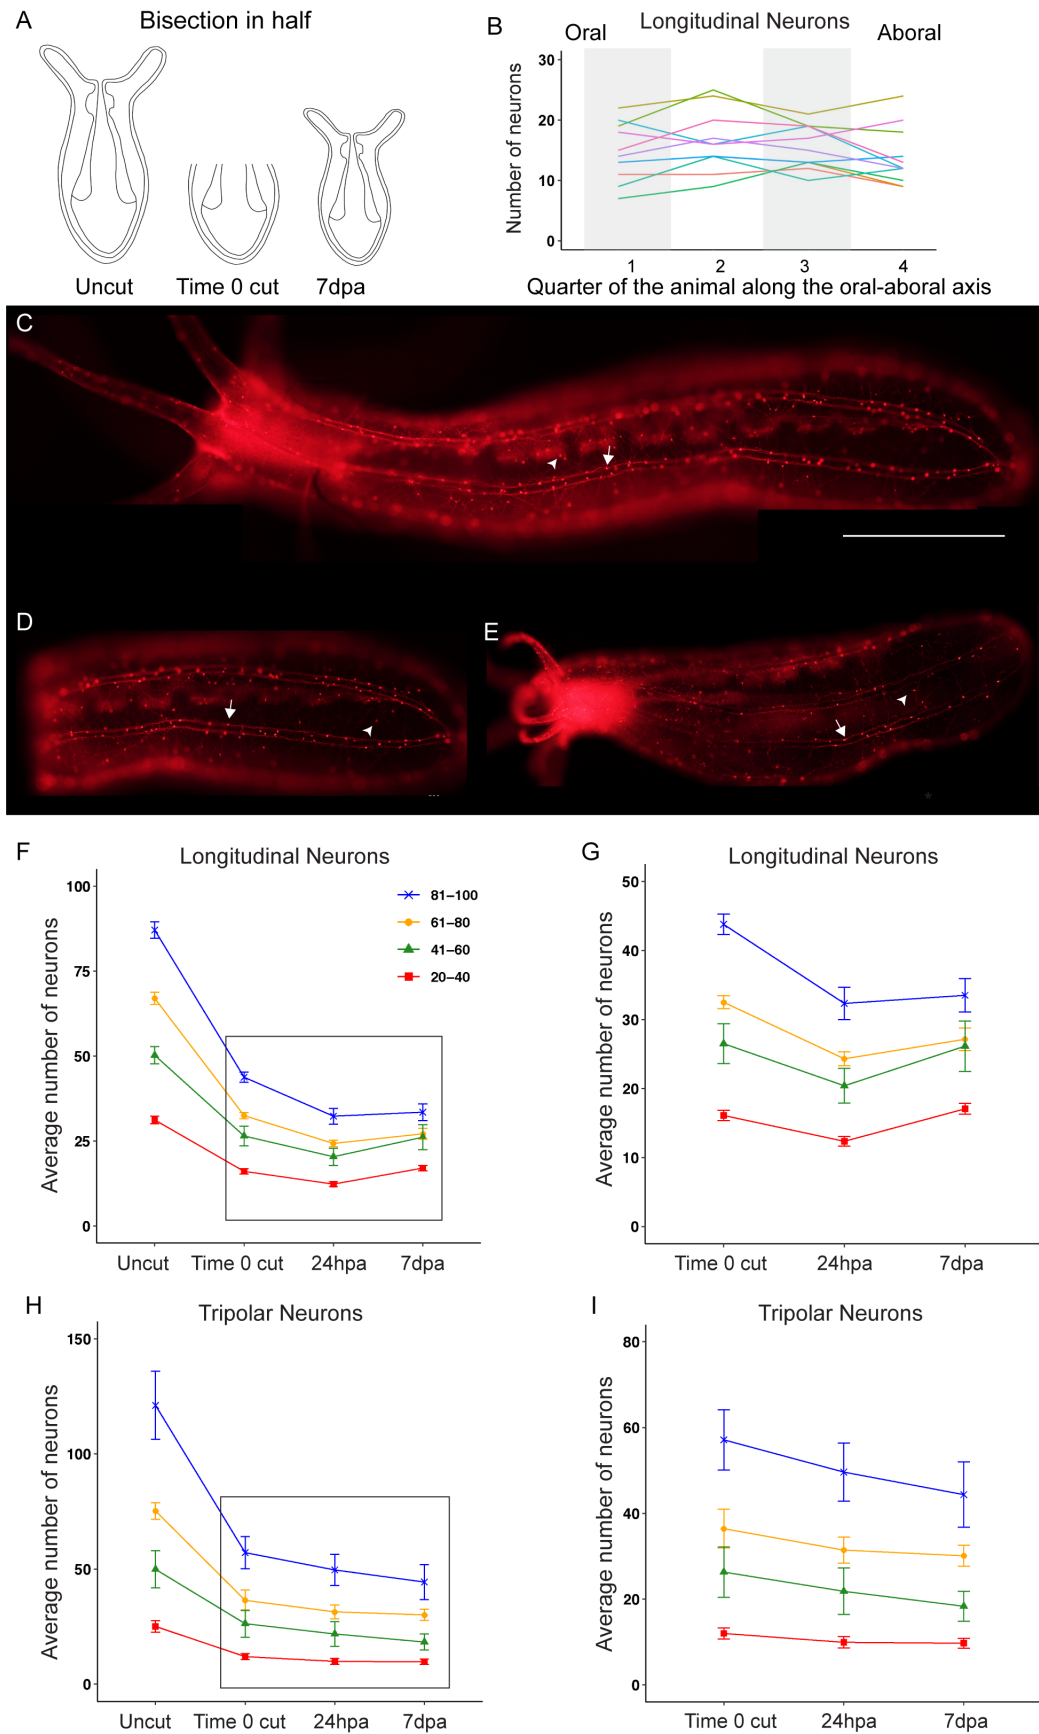

651

652 **Figure 1: Differential regeneration of *NvLWamide-like* neurons depends on the**  
653 **specific neuronal subtype.** (A) Schematic for oral bisection at ~50% body length. (B)  
654 Quantification of the number of longitudinal neurons along the oral-aboral axis in each of  
655 the 4 equal quarters. Each line represents an individual animal. (C) Uncut *NvLWamide-*  
656 *like::mCherry* expressing animal. (D) Same animal as C at time 0 cut. (E) Same animal  
657 as C and D at 7 days post amputation (dpa), with regenerated oral structures. (F-I)  
658 Quantification of longitudinal and tripolar neurons before amputation (uncut),  
659 immediately following bisection at the O-A midline (time 0 cut), 24hpa, and at  
660 completion of regeneration (7dpa) in small (red), medium (green), medium-large  
661 (orange), and large (blue) sized animals. The numbers of longitudinal neurons (F) or  
662 tripolar neurons (H) never regenerate back to their original pre-cut numbers. (G)  
663 Longitudinal neurons regenerate back to numbers similar to time 0 cut in the small and  
664 medium sized animals, but do not regenerate in the larger animals by 7dpa. (I) Tripolar  
665 neurons do not regenerate by 7dpa. N = 40 animals. Scale bar = 1mm. ((G) Mixed  
666 ANOVA: interaction effect between animal size and observation time:  $F_{6,70} = 10.27$ ,  $p <$   
667  $0.001$ ,  $\eta_p^2 = 0.47$ ; (I) Mixed ANOVA: main effect of observation time Tripolar:  $F_{1,4,46.9} =$   
668  $20.70$ ,  $p = < 0.001$ ,  $\eta_p^2 = 0.38$ ). Data points in F-I represent mean  $\pm$  SEM.

669  
670  
671  
672  
673  
674  
675  
676  
677  
678  
679  
680  
681  
682

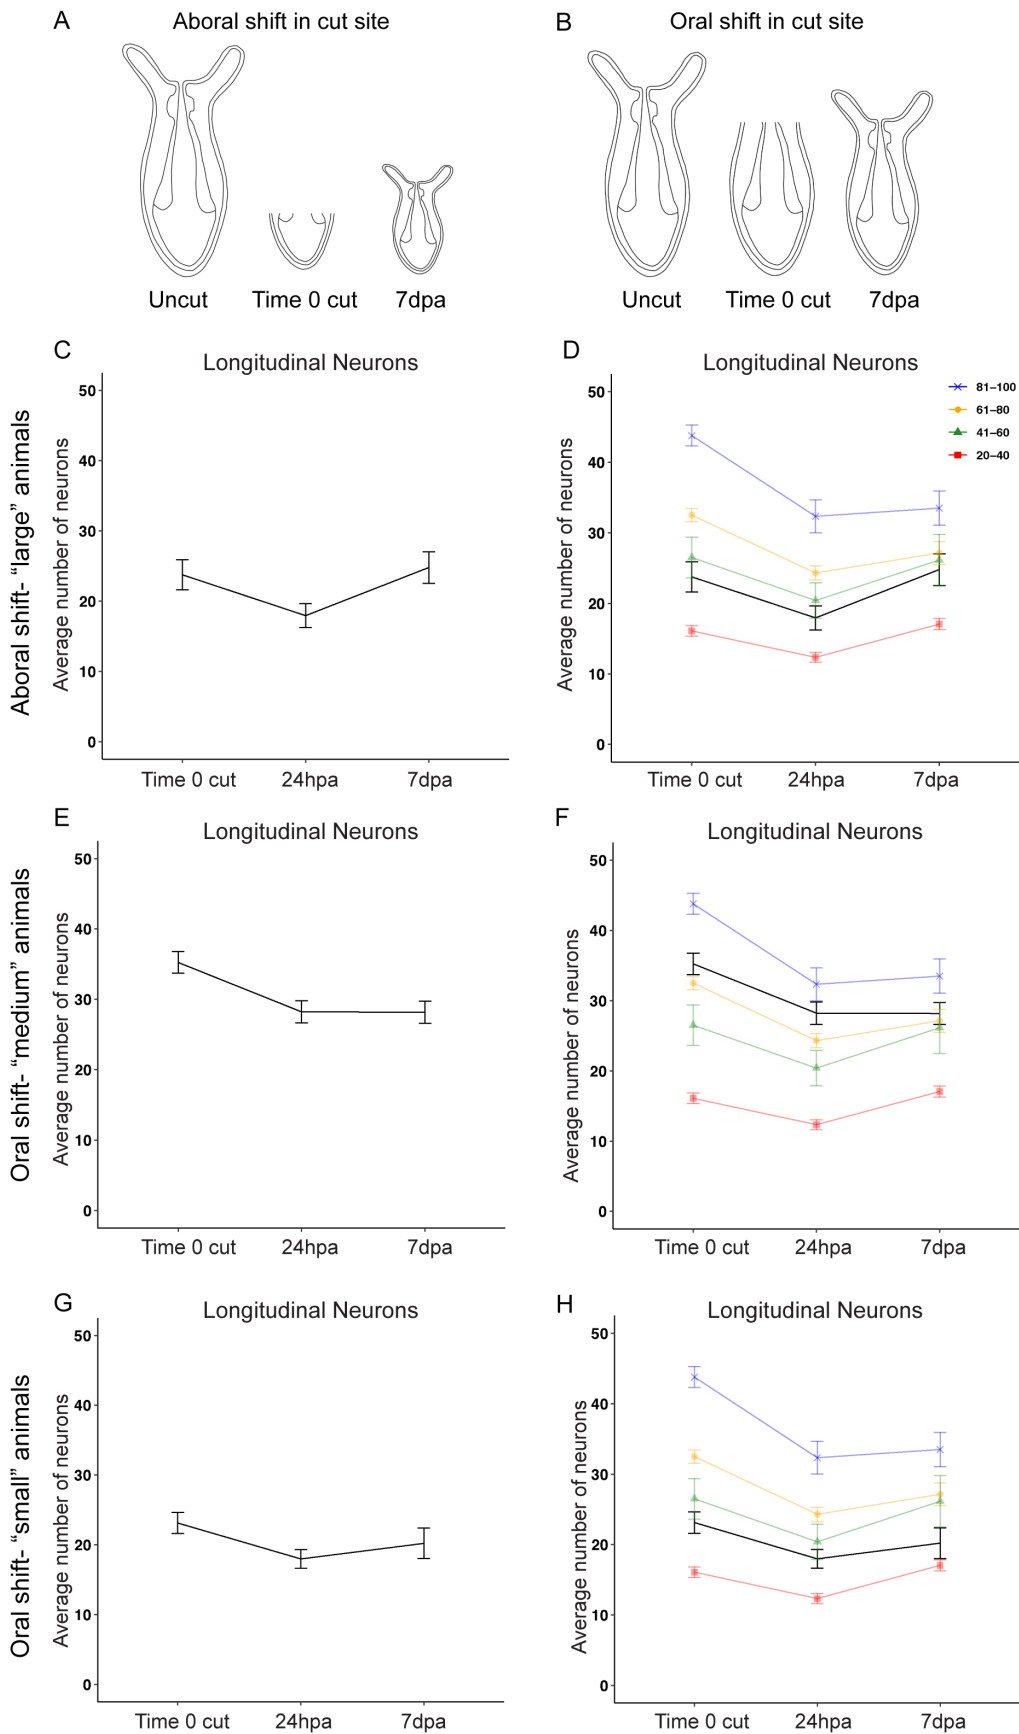

683

684 **Figure 2: Regeneration of longitudinal neurons depends on the size of the**  
685 **regenerating fragment.** (A-B) Schematics demonstrating the shifts in cut sites used to  
686 obtain remnant fragments of varying sizes. (C-H) Quantification of longitudinal neurons  
687 in regenerates with shifted cut sites at time 0 cut, 24hpa, and 7dpa. Regenerates from an  
688 aborally-shifted cut site in large animals regenerated their longitudinal neurons (C),  
689 resembling regenerates of small and medium sized animals cut at the midline of the O-A  
690 axis (D). Regenerates from an orally-shifted cut site in medium animals did not  
691 regenerate their longitudinal neurons (E), resembling regenerates from large animals cut  
692 at the midline of the O-A axis (F). Regenerates from an orally-shifted cut site in small  
693 animals still regenerated their longitudinal neurons (G), resembling regenerates from  
694 medium animals cut at the midline of the O-A axis (H). N = 8 large; 13 medium; 13  
695 small. Arrows indicate longitudinal neurons and arrowheads indicate tripolar neurons  
696 (Repeated measure ANOVA comparing observation times: (C) Large,  $F_{2,14} = 5.58$ ,  $p =$   
697  $0.017$ ,  $\eta_p^2 = 0.44$ ; (E) Medium,  $F_{2,24} = 21.67$ ,  $p < 0.001$ ,  $\eta_p^2 = 0.64$ ; (G) Small,  $F_{2,24} =$   
698  $8.56$ ,  $p = 0.002$ ,  $\eta_p^2 = 0.42$ ). Data points in C-H represent mean  $\pm$  SEM.

699  
700  
701  
702  
703  
704  
705  
706  
707  
708  
709  
710  
711  
712  
713  
714

715

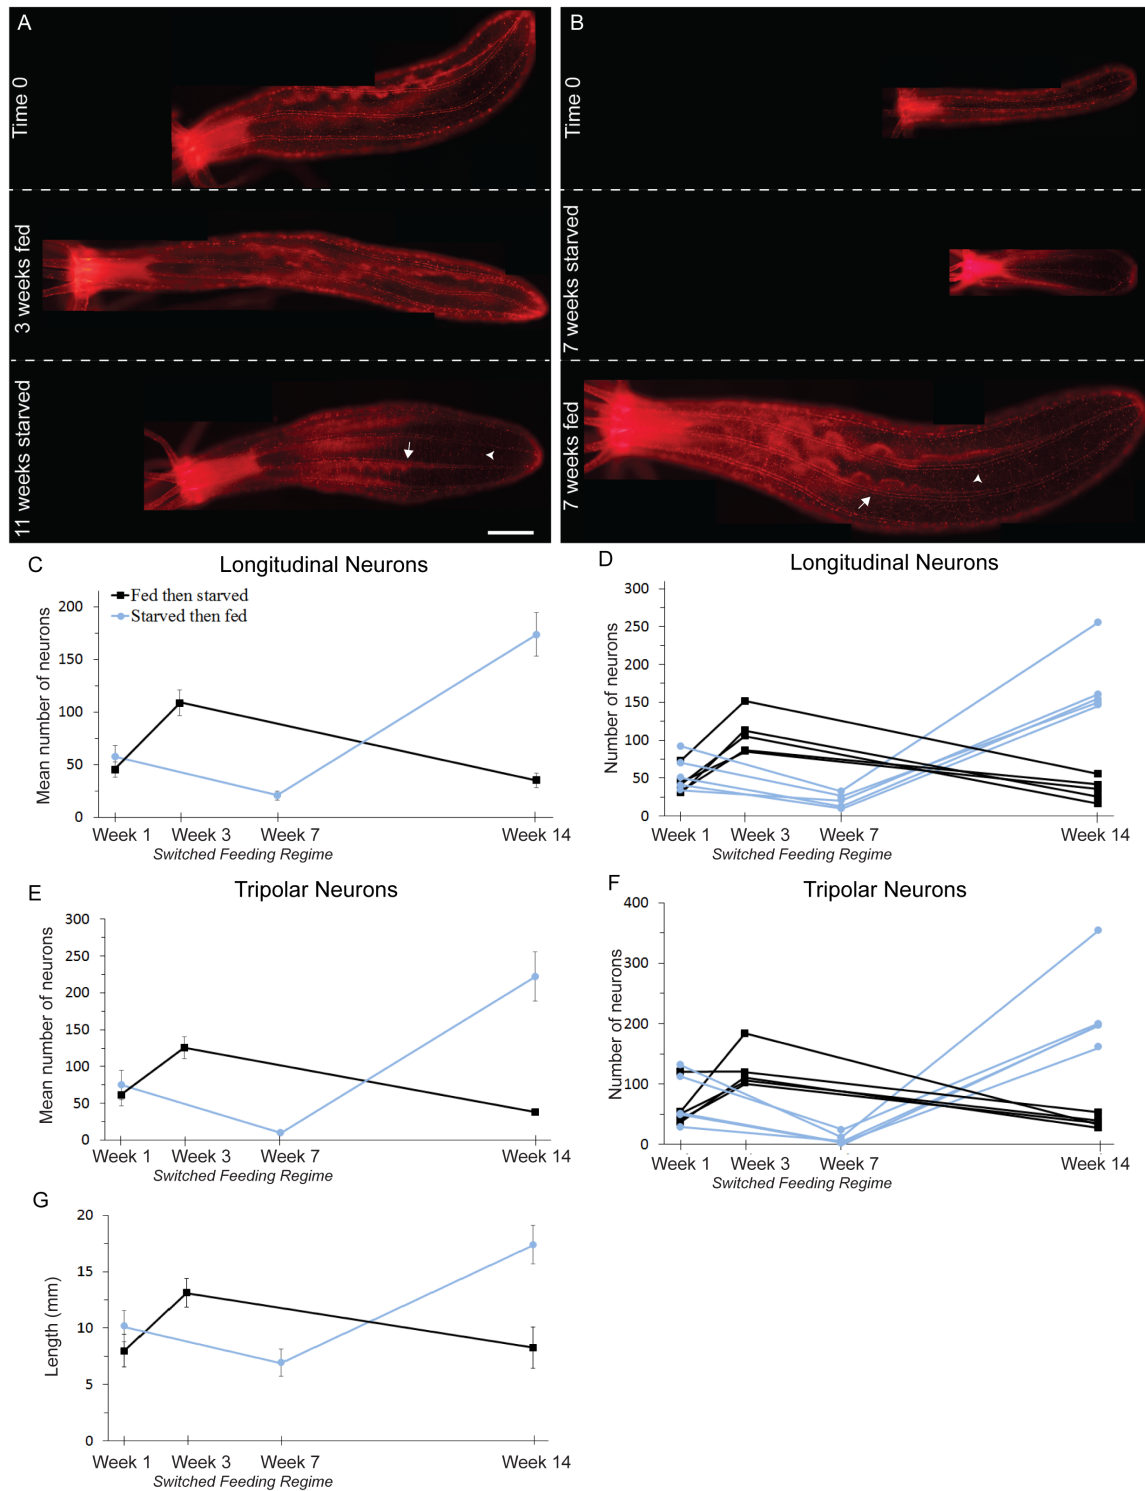

716

717 **Figure 3: The *Nematostella* nerve net scales with changes in length. (A-B)**

718 Visualization of *NvLWamide*-like neurons in relation to body size during periods of

719 feeding and starvation. (C-F) Quantification of *NvLWamide*-like neurons during periods

720 of growth and starvation with both mean (C, E) and population (D, F) data presented.  
721 Animals fed for 3 weeks rapidly grew longer in length (A, 3 weeks fed), and numbers of  
722 both longitudinal (C and D, black lines) and tripolar (E and F, black lines) neurons  
723 significantly increased. Following 11 weeks starvation, the same animal then shrunk in  
724 size (A, 11 weeks starved) and the numbers of both longitudinal and tripolar neurons  
725 significantly decreased (C-F, black lines). Animals initially starved for 7 weeks shrunk in  
726 size (B, 7 weeks starved) and number of both longitudinal (C and D, blue lines) and  
727 tripolar (E and F, blue lines) significantly decreased. Upon being switched to feeding  
728 regime for 7 weeks the same animals grew longer (B, 7 weeks starved) and the numbers  
729 of both longitudinal and tripolar neurons significantly increased (C-F, blue lines). Oral  
730 end is to the left. Scale bar = 1mm. N = 5 animals per treatment group. Arrows indicate  
731 longitudinal neurons and arrowheads indicate tripolar neurons. (Mixed ANOVA of  
732 interaction between assigned feeding regime and observation time: (C) Longitudinal,  
733  $F_{2,16} = 102.01, p < 0.001, \eta_p^2 = 0.93$ ; (E) Tripolar,  $F_{2,16} = 48.60, p < 0.001, \eta_p^2 = 0.86$ ).  
734 (G) The measured length of the animals significantly decreased during the starvation  
735 period and increased during the feeding period (Mixed ANOVA: interaction effect  
736 between assigned feeding regime and observation time:  $F_{2,34} = 25.75, p < 0.001, \eta_p^2 =$   
737 0.60). Data points in C, E and G represent mean  $\pm$  SEM.

738  
739  
740  
741  
742  
743  
744  
745  
746  
747  
748  
749  
750



751

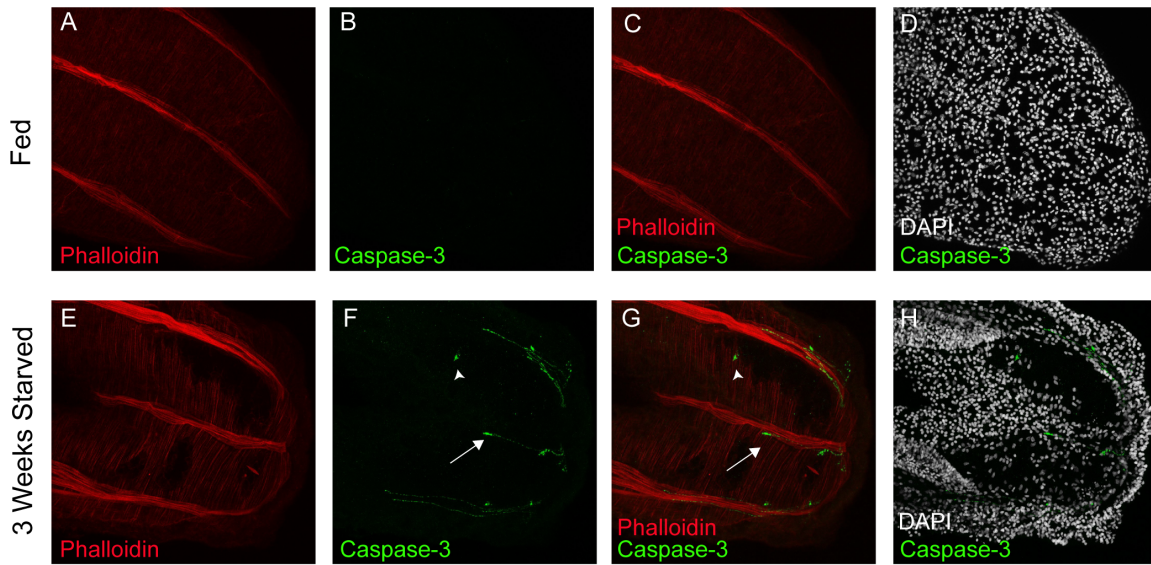

752

753

754

755 **Figure 4: Increased apoptosis in 3-week starved animals.** (A-D) Normally fed animals  
756 did not have activated Caspase-3 staining in the most aboral region in 14 out of 16  
757 animals examined (2/16 had positive staining, data not shown). (E-H) Animals that were  
758 starved for 3 weeks had positive Caspase-3 visible in the most aboral region in 15 out of  
759 15 animals examined. (F-H) Caspase-3 was located along the endodermal longitudinal  
760 tracks in the most aboral region (arrow) and in the aboral body column (arrowhead).

761

762

763

764

765

766

767

768

769

770

771

772

|



773

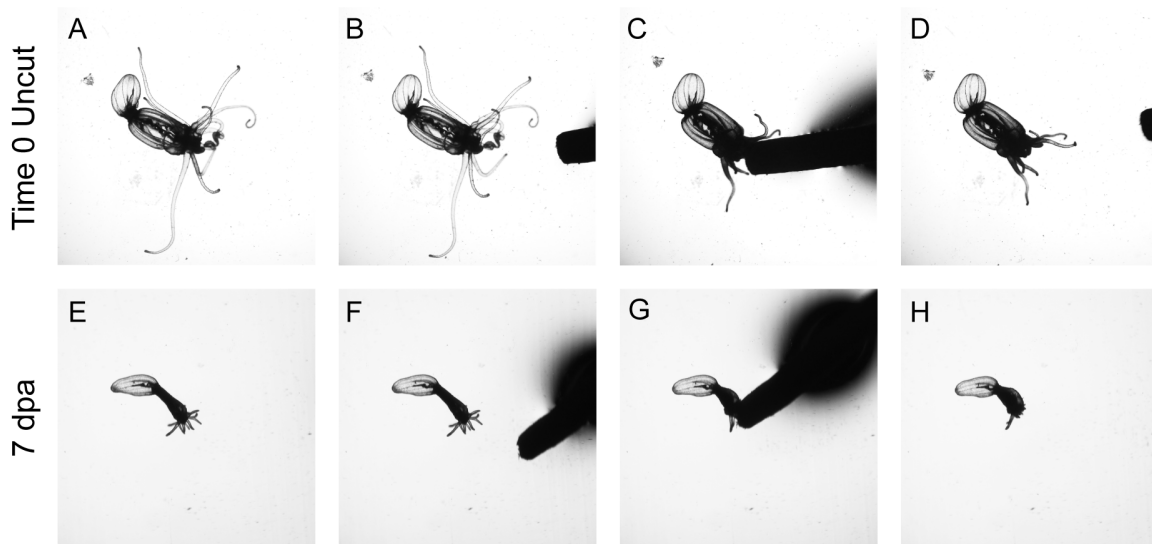

774

775

776

777 **Figure 5: Response to poking assay is maintained in regenerating animals. (A-D)**

778 *Nematostella* respond to the touch stimulus by retracting its tentacles when touched with

779 a toothpick (N = 8/8). (E-H) At 7 days post amputation the same animal again responded

780 to being poked with a toothpick by retracting its tentacles (N = 8/8).

781

782

783

784

785

786

787

788

789

790

791

792

793

794

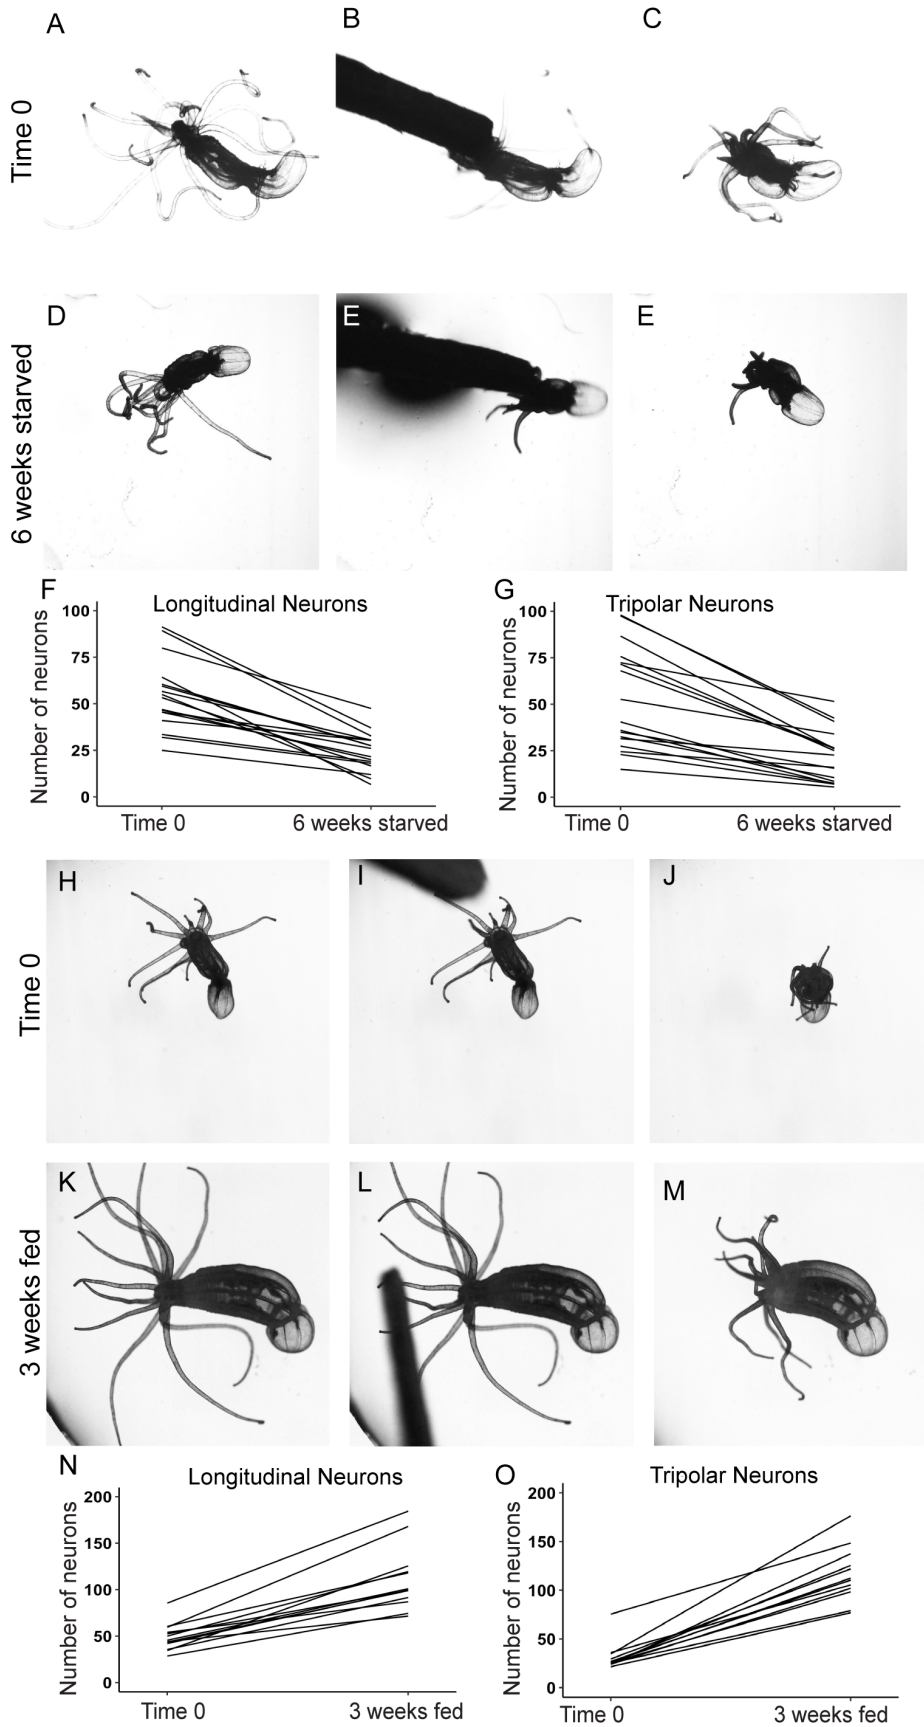

795

796 **Figure 6: Starved and fed animals respond to the Poking assay by retracting their**  
797 **tentacles and body.** (A-E) A normally fed animal responded to the touch stimulus from a  
798 toothpick by retracting its tentacles and oral region (N = 17/19). (D-E) Following 6-7  
799 weeks starvation, the same animal again responded to being touched with a toothpick by  
800 retracting its tentacles and oral region (N = 17/19). (F-G) Quantification of the number of  
801 longitudinal and tripolar neurons in individual animals following each poking  
802 experiment. The numbers of both longitudinal (I:  $t_{16} = 7.97$ ,  $p < 0.001$ ,  $\eta_p^2 = 0.80$ ) and  
803 tripolar (J:  $t_{16} = 6.99$ ,  $p < 0.001$ ,  $\eta_p^2 = 0.75$ ) neurons significantly decreased after 6-7  
804 weeks starvation. (H-J) A normally fed animal responded to the touch stimulus from a  
805 toothpick by retracting its tentacles and body (N = 13/13). (K-M) Following 3 weeks  
806 feeding, the same animal again responded to being touched with a toothpick by retracting  
807 its tentacles and oral region (N = 12/13). (N-O) Quantification of the number of  
808 longitudinal and tripolar neurons in individual animals following each poking  
809 experiment. The numbers of both longitudinal (G:  $t_{12} = -9.15$ ,  $p < 0.001$ ,  $\eta_p^2 = 0.88$ ) and  
810 tripolar (H:  $p = t_{12} = -12.76$ ,  $p < 0.001$ ,  $\eta_p^2 = 0.93$ ) neurons significantly increased  
811 following 3 weeks feeding.

812  
813  
814  
815  
816  
817  
818  
819  
820  
821  
822  
823  
824  
825

826 **Table 1:** Summary of the analysis for the action-reaction Poking assay in regenerated,  
827 starved, and fed animals.

828

| Treatment    | Timepoint         | Number of animals that responded to the touch stimulus | Percent of animals that responded to the touch stimulus |
|--------------|-------------------|--------------------------------------------------------|---------------------------------------------------------|
| Regeneration | Uncut             | 8/8                                                    | 100%                                                    |
|              | 7dpa              | 8/8                                                    | 100%                                                    |
| Starved      | Time 0            | 17/19                                                  | 89%                                                     |
|              | 6-7 weeks starved | 17/19                                                  | 89%                                                     |
| Fed          | Time 0            | 13/13                                                  | 100%                                                    |
|              | 3 weeks fed       | 12/13                                                  | 92%                                                     |

829

830

831

832

833

834

835

836

837

838

839

840

841

842

843

844

845

846

847

848

849

850

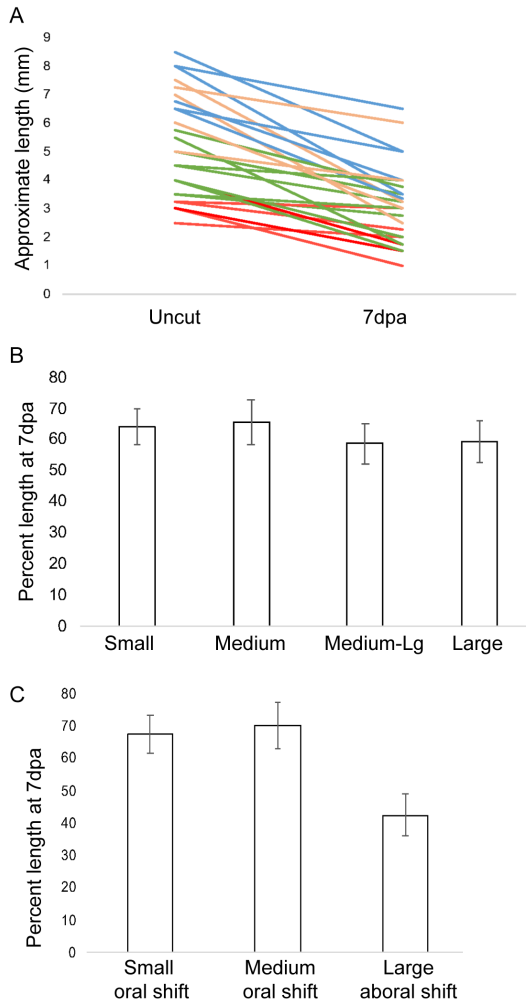

851

852

853 **Supplemental Figure 1: Regenerated *Nematostella* did not return to their original**

854 **length by 7dpa.** Length was measured with a ruler under a dissection microscope at the

855 start of the experiment before oral bisection (“Uncut”). The animals never re-grew back

856 to their original length, and there was no difference in the percent length of the

857 regenerates relative to their body size by 7dpa. (A) Percent length for animals bisected in

858 half. N = 11 small; 8 medium; 6 medium-large; 6 large (One way ANOVA:  $F_{3,27} = 0.23$ ,

859  $p = 0.875$ ,  $\eta_p^2 = 0.025$ ). (B) Population data showing lengths for individual animals

860 before they were cut (uncut) and 7dpa. Small animals are represented in red, medium in

861 green, medium-large in orange, and large in blue ( $t_{30} = 8.65$ ,  $p < 0.001$ ,  $\eta_p^2 = 0.71$ ). N =

862 31 animals. (C) Percent length for animals with the shifted cut sites. N = 13 small oral

863 shift; 11 medium oral shift; 7 large aboral shift (One way ANOVA:  $F_{2,17} = 8.12$ ,  $p =$

864  $0.003$ ,  $\eta_p^2 = 0.488$ ). Bars in A and C represent mean  $\pm$  SEM.

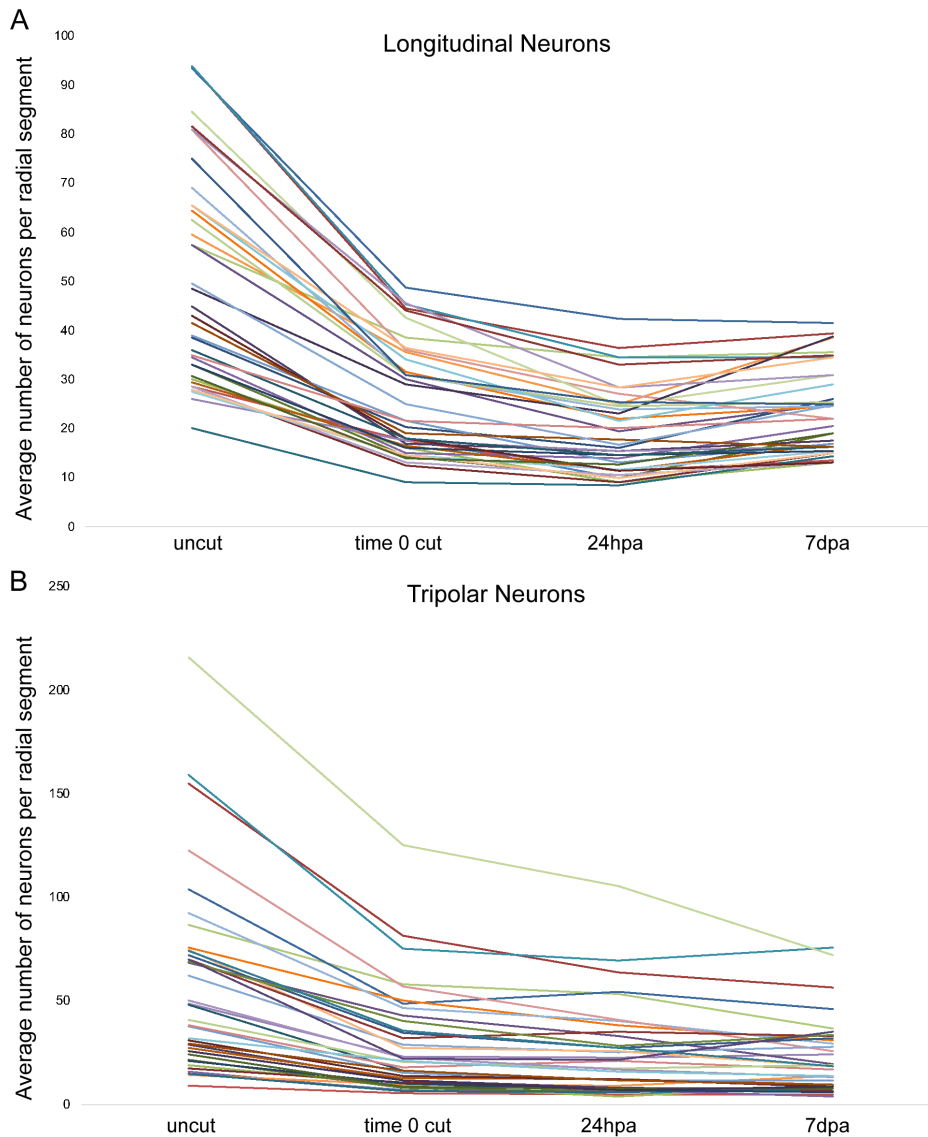

865

866

867

868 **Supplemental Figure 2: Quantification of neuronal numbers during oral**

869 **regeneration per individual regenerating animal.** Population data showing the time

870 course of the average number of (A) longitudinal neurons and (B) tripolar neurons per 2-

871 3 radial segments in individual regenerating animals bisected in half. Neuronal numbers

872 do not return to levels present in the uncut animal. Quantifications were taken before

873 cutting (uncut), time 0 cut, 24hpa, and 7dpa. N = 40 animals. Data represented here is the

874 same dataset grouped by starting size and averaged in Figure 1.

875

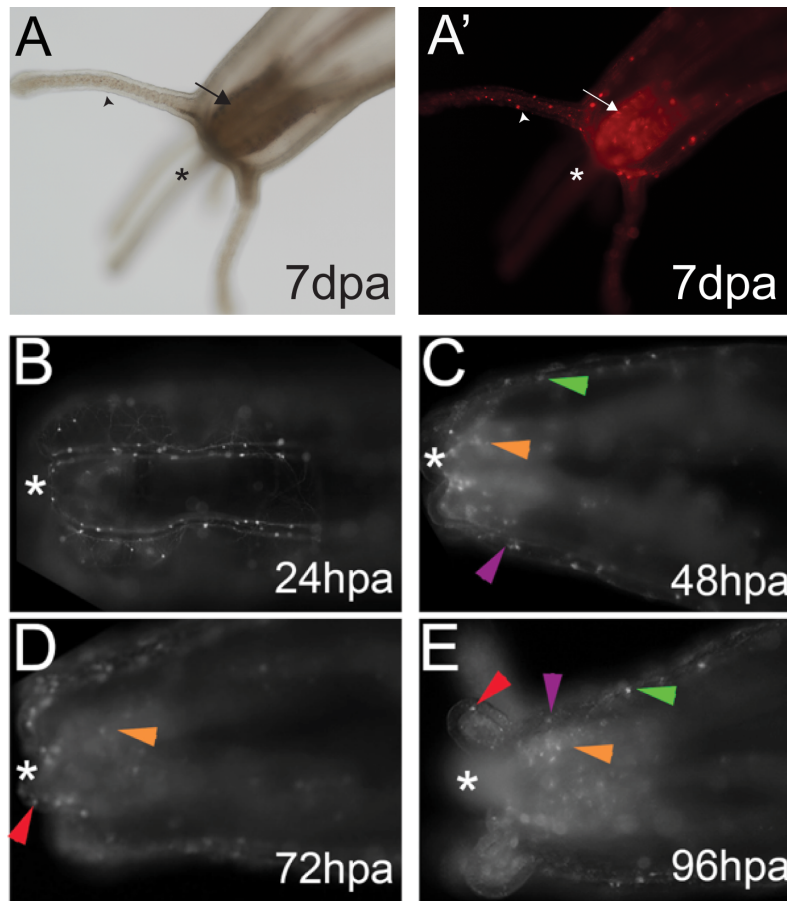

876

877 **Supplemental Figure 3. Regeneration of oral structures and neurons in**

878 *NvLWamide-like::mCherry* animals following bisection along the O-A axis. (A)

879 Regenerated oral structures, including a mouth, pharynx (arrow), and tentacles at 7dpa.

880 (A') New neurons are observed in the regenerated oral structures, including pharyngeal

881 (arrow) and tentacular (arrowhead) neurons. (B) Remnant fragment at 24hpa. No new

882 structures are observed at this timepoint. (C) Tentacle buds are visible in the remnant

883 fragment at 48hpa. Longitudinal (green arrowhead) and tripolar (purple arrowhead)

884 neurons are observed. Regenerated pharyngeal neurons are also present in the

885 regenerating pharynx (orange arrowhead) at 48hpa. (D) Pharyngeal (orange arrowhead)

886 and tentacular (red arrowhead) neurons are clearly visible in these regenerating structures

887 by 72hpa. (E) Clearly regenerated pharyngeal (orange arrowhead) and tentacular (red

888 arrowhead) neurons are seen at 96hpa. Longitudinal neurons (green arrowhead) also

889 populate the regenerated tissue, but if these are regenerated neurons or from the remnant

890 is undetermined. Asterisks indicate oral opening.

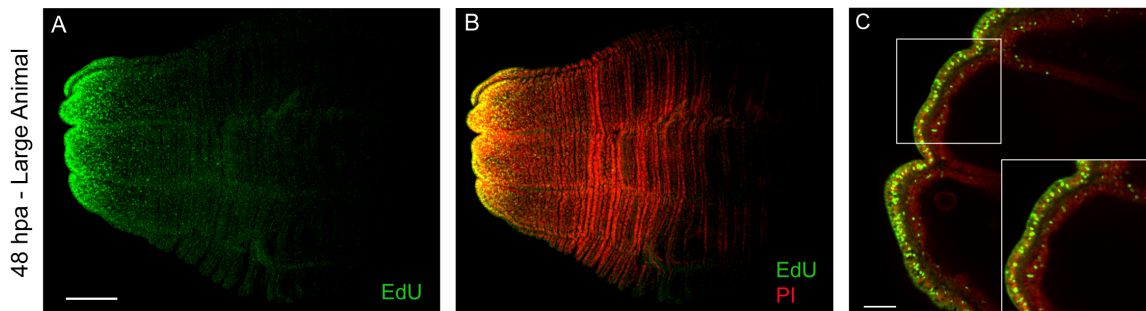

891

892

893 **Supplemental Figure 4: Detection of proliferating cells in “large” *Nematostella***

894 **during oral regeneration.** (A) EdU (green) is detected at 48hpa in the oral-most region

895 of “large” regenerating animals bisected in half. (B) EdU overlaid with propidium iodide

896 (PI, red) stain in the same animal as A, with yellow color showing co-expression. (C)

897 Higher magnification image of the same animal, showing EdU detection in both the

898 ectoderm and endoderm, suggesting both tissue layers proliferate during oral

899 regeneration. N = 3 large animals. Scale bars for A and B = 200um; C = 50um.

900

901

902

903

904

905

906

907

908

909

910

911

912

913

914

915

916

|



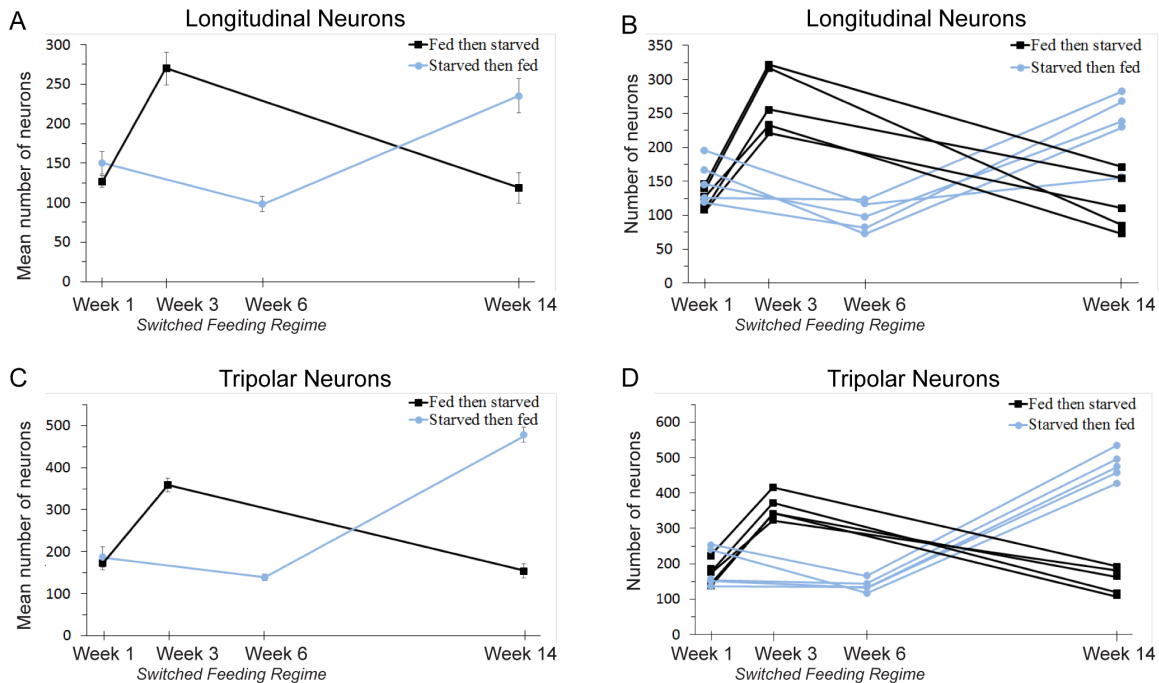

917

918

919

920 **Supplemental Figure 5: Independent experiment demonstrating *Nematostella* nerve**

921 **net scales with changes in length. (A-D) Quantification of *NvLWamide-like* neurons**

922 during periods of feeding and starvation with both mean (A,C) and population (B,D) data

923 presented. The numbers of both longitudinal (A and B, black lines) and tripolar (C and D,

924 black lines) neurons significantly increased with 3 weeks of feeding, and then both

925 longitudinal and tripolar neurons significantly decreased with 11 weeks starvation (A-D,

926 black lines). The numbers of both longitudinal (A and B, blue lines) and tripolar (C and

927 D, blue lines) significantly decreased following 6 weeks starvation. Upon being switched

928 to feeding regime for 8 weeks the numbers of both longitudinal and tripolar neurons

929 significantly increased (A-D, blue lines) (Mixed ANOVA: interaction effect between

930 assigned feeding regime and observation time: (A) Longitudinal,  $F_{2,16} = 38.88$ ,  $p <$

931  $0.001$ ,  $\eta_p^2 = 0.83$ ; (C) Tripolar,  $F_{2,16} = 206.13$ ,  $p < 0.001$ ,  $\eta_p^2 = 0.96$ ). Data points in A

932 and C represent mean  $\pm$  SEM.

933

934

935

936

937

938 **References**

939

940 Amiel, A.R. et al., 2015. Characterization of Morphological and Cellular Events

941 Underlying Oral Regeneration in the Sea Anemone, *Nematostella vectensis*.

942 *International Journal of Molecular Sciences*, 16(12), pp.28449–28471.

943 Baguna, J., Romero, R.Romero, 1981. Quantitative analysis of cell types during growth,

944 degrowth, and regeneration in the planarians *Dugesia mediterranea* and *Dugesia*

945 *tigrina*. *Hydrobiologia*, 84, pp.181–194.

946 Bossert, P.E., Dunn, M.P. & Thomsen, G.H., 2013. A staging system for the regeneration

947 of a polyp from the aboral physa of the anthozoan Cnidarian *Nematostella vectensis*.

948 *Developmental Dynamics*, 242(11), pp.1320–1331.

949 Bowers, M. et al., 2015. BLOOD582924 2678..2688. *Blood*, 125(17), pp.2678–2688.

950 Busengdal, H. & Rentzsch, F., 2017. Unipotent progenitors contribute to the generation

951 of sensory cell types in the nervous system of the cnidarian *Nematostella vectensis*.

952 *Developmental biology*, 431(1), pp.59–68.

953 Caldwell, L.J. et al., 2019. Regeneration of Dopaminergic Neurons in Adult Zebrafish

954 Depends on Immune System Activation and Differs for Distinct Populations. *The*

955 *Journal of Neuroscience*, 39(24), pp.4694–4713.

956 Calvi, L.M. et al., 2003. Identification of the haematopoietic stem cell niche and control

957 of the niche size. *Nature*, 425(6960), pp.841–846.

958 Cebrià, F. et al., 2002. Dissecting planarian central nervous system regeneration by the

959 expression of neural-specific genes. *Development, Growth & Differentiation*, 44(2),

960 pp.135–146.

961 Chen, C.C.G., Wang, I.E. & Reddien, P.W., 2013. *pbx* is required for pole and eye

962 regeneration in planarians. 140(4), pp.719–729.

963 Currie, K.W. & Pearson, B.J., 2013. Transcription factors *lhx1/5-1* and *pitx* are required

964 for the maintenance and regeneration of serotonergic neurons in planarians.

965 *Development*, 140(17), pp.3577–3588.

966 Deochand, M.E., Birkholz, T.R. & Beane, W.S., 2016. Temporal regulation of planarian

967 eye regeneration. *Regeneration*, 3(4), pp.209–221.

968 D'Amelio, M., Sheng, M. & Cecconi, F., 2012. Caspase-3 in the central nervous system:

969 beyond apoptosis. *Trends in Neurosciences*, 35(11), pp.700–709.

970 Elmore, S., 2016. Apoptosis: A Review of Programmed Cell Death. *Toxicologic*

971 *Pathology*, 35(4), pp.495–516.

972 Fritz, A.E. et al., 2013. Mechanisms of tentacle morphogenesis in the sea anemone

- 973 Nematostella vectensis. *Development*, 140(10), pp.2212–2223.
- 974 Gahan, J.M. et al., 2017. Functional studies on the role of Notch signaling in Hydractinia  
975 development. *Developmental biology*, 428(1), pp.224–231.
- 976 Galliot, B. et al., 2007. RNAi gene silencing affects cell and developmental plasticity in  
977 hydra. *Comptes Rendus Biologies*, 330(6-7), pp.491–497.
- 978 Hand, C. & Uhlinger, K.R., 1992. The Culture, Sexual and Asexual Reproduction, and  
979 Growth of the Sea Anemone *Nematostella vectensis*. *Biological Bulletin*, 182,  
980 pp.169–176.
- 981 Havrilak, J.A. et al., 2017. Characterization of NvLWamide-like neurons reveals  
982 stereotypy in Nematostella nerve net development. *Developmental biology*, pp.1–0.
- 983 Jahnel, S.M., Walzl, M. & Technau, U., 2014. Development and epithelial organisation  
984 of muscle cells in the sea anemone *Nematostella vectensis*. 11(1), pp.1–15.
- 985 Kuida, K. et al., 1996. Decreased apoptosis in the brain and premature lethality in  
986 CPP32-deficient mice. *Nature*, 384, pp.368–372.
- 987 Layden, M.J. et al., 2010. Expression and phylogenetic analysis of the zic gene family in  
988 the evolution and development of metazoans. *EvoDevo*, 1(1), p.12. Available at:  
989 <http://eutils.ncbi.nlm.nih.gov/entrez/eutils/elink.fcgi?dbfrom=pubmed&id=21054859>  
990 &retmode=ref&cmd=prlinks.
- 991 Layden, M.J. et al., 2016. MAPK signaling is necessary for neurogenesis in *Nematostella*  
992 *vectensis*. *BMC Biology*, 14(1), p.61.
- 993 Leclère, L. et al., 2016. Development of the aboral domain in *Nematostella* requires  $\beta$ -  
994 catenin and the opposing activities of Six3/6 and Frizzled5/8. *Development*, 143(10),  
995 pp.1766–1777.
- 996 Marlow, H., Matus, D.Q. & Martindale, M.Q., 2013. Ectopic activation of the canonical  
997 wnt signaling pathway affects ectodermal patterning along the primary axis during  
998 larval development in the anthozoan *Nematostella vectensis*. *Developmental biology*,  
999 380(2), pp.324–334.
- 1000 Miljkovic-Licina, M. et al., 2007. Head regeneration in wild-type hydra requires de novo  
1001 neurogenesis. 134(6), pp.1191–1201.
- 1002 Moya, A. et al., 2016. Functional conservation of the apoptotic machinery from coral to  
1003 man: the diverse and complex Bcl-2 and caspase repertoires of *Acropora millepora*.  
1004 *BMC Genomics*, pp.1–21.
- 1005 Nakanishi, N. et al., 2012. Nervous systems of the sea anemone *Nematostella vectensis*  
1006 are generated by ectoderm and endoderm and shaped by distinct mechanisms.  
1007 *Development*, 139(2), pp.347–357.

- 1008 Oviedo, N.J., Newmark, P.A. & Sánchez Alvarado, A., 2003. Allometric scaling and  
1009 proportion regulation in the freshwater planarian *Schmidtea mediterranea*.  
1010 *Developmental Dynamics*, 226(2), pp.326–333.
- 1011 Passamaneck, Y.J. & Martindale, M.Q., 2012. Cell proliferation is necessary for the  
1012 regeneration of oral structures in the anthozoan cnidarian *Nematostella vectensis*.  
1013 *BMC Developmental Biology*, 12(1), p.34.
- 1014 Renfer, E. et al., 2010. A muscle-specific transgenic reporter line of the sea anemone,  
1015 *Nematostella vectensis*. *Proceedings of the National Academy of Sciences of the*  
1016 *United States of America*, 107(1), pp.104–108.
- 1017 Rentzsch, F., Layden, M. & Manuel, M., 2016. The cellular and molecular basis of  
1018 cnidarian neurogenesis. *Wiley Interdisciplinary Reviews: Developmental Biology*,  
1019 pp.1–19.
- 1020 Richards, G.S. & Rentzsch, F., 2014. Transgenic analysis of a SoxB gene reveals neural  
1021 progenitor cells in the cnidarian *Nematostella vectensis*. *Development*, 141(24),  
1022 pp.4681–4689.
- 1023 Roberts-Galbraith, R.H., Brubacher, J.L. & Newmark, P.A., 2016. A functional genomics  
1024 screen in planarians reveals regulators of whole-brain regeneration. *eLIFE*, pp.1–31.
- 1025 Romero, R. & BAGUÑA, J., 1991. Quantitative cellular analysis of growth and  
1026 reproduction in freshwater planarians (*Turbellaria*; *Tricladida*). I. A cellular  
1027 description of the intact organism. *Invertebrate Reproduction & Development*, 19(2),  
1028 pp.157–165.
- 1029 Röttinger, E., Dahlin, P. & Martindale, M.Q., 2012. A Framework for the Establishment  
1030 of a Cnidarian Gene Regulatory Network for “Endomesoderm” Specification: The  
1031 Inputs of  $\beta$ -Catenin/TCF Signaling M. C. Mullins, ed. *PLoS Genetics*, 8(12),  
1032 p.e1003164.
- 1033 Siebert, S. et al., 2018. Stem cell differentiation trajectories in *Hydra* resolved at single-  
1034 cell resolution. pp.1–29.
- 1035 Sinigaglia, C. et al., 2013. The bilaterian head patterning gene *six3/6* controls aboral  
1036 domain development in a cnidarian. *PLoS Biology*, 11(2), p.e1001488.
- 1037 Steinmetz, P.R.H. et al., 2017. Gut-like ectodermal tissue in a sea anemone challenges  
1038 germ layer homology. *Nature Ecology & Evolution*, 1(10), pp.1–0.
- 1039 Takeda, H., Nishimura, K. & Agata, K., 2009. Planarians Maintain a Constant Ratio of  
1040 Different Cell Types During Changes in Body Size by Using the Stem Cell System.  
1041 *Zoological Science*, 26(12), pp.805–813.
- 1042 Tay, T.L. et al., 2017. A new fate mapping system reveals context-dependent random or  
1043 clonal expansion of microglia. *Nature Neuroscience*, 20(6), pp.793–803.

- 1044 Tucker, R.P., Shibata, B. & Blankenship, T.N., 2011. Ultrastructure of the mesoglea of  
1045 the sea anemone *Nematostella vectensis* (Edwardsiidae). *Invertebrate Biology*,  
1046 130(1), pp.11–24.
- 1047 van Ham, T.J. et al., 2014. Intravital correlated microscopy reveals differential  
1048 macrophage and microglial dynamics during resolution of neuroinflammation.  
1049 *Disease Models & Mechanisms*, 7(7), pp.857–869.
- 1050 Warner, J.F. et al., 2019. Regeneration is a partial redeployment of the embryonic gene  
1051 network. *bioRxiv*, 121, pp.1731–28.
- 1052 Williams, R.B., 1975. A redescription of the brackish-water sea anemone *Nematostella*  
1053 *vectensis* Stephenson, with an appraisal of congeneric species. *Journal of Natural*  
1054 *History*, 9(1), pp.51–64.
- 1055 Zhang, J. et al., 2003. Identification of the haematopoietic stem cell niche and control of  
1056 the niche size. *Nature*, 425(6960), pp.836–841.
- 1057
